# Supplementary material for: Enhanced monoacylglycerol lipolysis by ABHD6 promotes NSCLC pathogenesis
Source: PubMed Central journal article supplement — eBioMedicine. 2020 Mar 3;53:102696. doi: 10.1016/j.ebiom.2020.102696 (PMC7057193; doi:10.1016/j.ebiom.2020.102696), 2020-03-03
Supplement: mmc1.pdf [file mmc1.pdf]

## Additional files

**Figure S1.** Pharmacological inhibition or shRNA mediated knockdown of ABHD6 limits the invasion and migration of NSCLC cells without consistent effects on proliferation rates.

a) IHC for MAGL and ABHD6 in rat brain tissues.

b) Protein levels of ABHD12 in NSCLC cell lines, rat tissues, WAT, and INS.  
n = 3/group.

c) Immunofluorescence of MAGL and ABHD6 in A549 cells.

d) Proliferation of NSCLC cells with or without 10  $\mu$ M WWL70 treatment.  
n = 5/group.

e) Proliferation of shControl, shABHD6 and parental SPC-A-1 and A549 cells and Control, ABHD6-OE, and parental H1650 and H1975 cells. n = 5/group.

f, g) Invasion f) and migration g) of H1975 and H1650 cells with or without 10 $\mu$ M WWL70 treatment. n = 5/group. \**P* < 0.05 (Student's t-test) versus parental group.

h, i) Invasion h) and migration i) of shControl, shABHD6 and parental H1975 and H1650 cells. n = 5/group. \**P* < 0.05 (one-way ANOVA test) versus shControl group. Technical replicate with n = 3. Data are presented as means  $\pm$  SD.

**Figure S2.** Pharmacological inhibition of MAGL fails to affect invasion and migration of NSCLC cells, while ABHD6 silencing reduced metastasis and angiogenesis in the cells.

a, b) Invasion a) and migration b) of SPC-A-1 and A549 cells with or without 1 $\mu$ M JZL84 treatment. n = 5/group. Technical replicate with n = 3.

c) Tumor growth after subcutaneous injection with shControl, shABHD6, and parental SPC-A-1 and A549 cells (second cohort). n = 4-5/group. \* $P$  < 0.05; \*\* $P$  < 0.01 (one-way ANOVA test) versus shControl group.

d) Metastatic seeding to the lung of shControl/shABHD6 SPC-A-1 and A549 cells 7 weeks after intravenous transplantation (second cohort). Red arrows indicate cancer cell seeding.

e) Metastatic seeding to the lung of shControl/shABHD6 SPC-A-1 and A549 cells 2 days after intravenous transplantation, quantified by flow cytometry. n = 8/group. \* $P$  < 0.05; \*\* $P$  < 0.01 (Student's t-test) versus shControl group.

f) Angiogenesis in NSCLC cells *in vivo*. n = 4-5/group. Technical replicate with n = 2.

g) Proliferation of shControl/shABHD6 SPC-A-1 and A549 cells seeded in the lung, quantified by flow cytometry. n = 4/group. Normalized data from two independent experiments is shown. Technical replicate with n = 3.

h) A figure exemplified the gating strategy of flow cytometry was provided.

Data are presented as means  $\pm$  SD.

**Figure S3.** ABHD6 blockade impairs EMT process in NSCLC.

a) Expression of EMT markers in shControl/shABHD6 NSCLC cells.

n = 4/group. Technical replicate with n = 3.

b) Expression of EMT markers in tumor xenograft derived from subcutaneously

injected shControl/shABHD6 SPC-A-1 and A549 cells. n = 4/group. Technical replicate with n = 2.

c) Tumor growth after subcutaneous injection with Control, ABHD6-OE, and parental H1975 and H1650 cells (second cohort). n = 4-5/group. \**P* < 0.05;

\*\**P* < 0.01 (one-way ANOVA test) versus Control group.

d) Metastatic seeding to the lung of Control/ABHD6-OE SPC-A-1 and A549 cells 7 weeks after intravenous transplantation (second cohort).

Data are presented as means ± SD.

**Figure S4.** Invasion and migration of NSCLC cells with or without CB1/CB2 receptor antagonists treatment.

a, b) Invasion a) and migration b) of shControl/shABHD6 SPC-A-1 and A549 cells with or without 50 nM AM251 treatment. c, d) Invasion c) and migration d)

of shControl/shABHD6 SPC-A-1 and A549 cells with or without 50 nM AM630 treatment. n = 5/group. \**P* < 0.05; \*\**P* < 0.01 (one-way ANOVA test) versus

shControl group. #*P* < 0.05; ##*P* < 0.01 (one-way ANOVA test) versus shABHD6 group. Technical replicate with n = 3.

Data are presented as means ± SD.

**Figure S5.** Endocannabinoid signalling contributes little to ABHD6 involved pathophysiology in NSCLC.

a, b) Intracellular levels of AA and 2-AG in shControl/shABHD6 SPC-A-1 and A549 cells. n = 5/group. Technical replicate with n =3.

c, d) Invasion c) and migration d) of shControl/shABHD6 SPC-A-1 and A549 cells treated with or without exogenous 50  $\mu$ M AA treatment. n = 5/group. Technical replicate with n = 3.

e, f) Tumor growth of SPC-A-1 and A549 cells bearing mice fed with or without AA (1.1g/kg body weight). n = 5/group. Technical replicate with n = 2.

g) Levels of lipid metabolites in SPC-A-1 and A549 cells.

Data are presented as means  $\pm$  SD.

**Figure S6.** MAGs regulate EMT pathway and act as PPAR $\alpha$ / $\gamma$  ligands, and PPAR $\alpha$ / $\gamma$  antagonists suppress the elevated expressions of PPAR $\alpha$ / $\gamma$  target genes in shABHD6 NSCLC cells.

a) Expression of EMT markers in SPC-A-1 and A549 cells with or without C16:0 MAG (10  $\mu$ M) or C18:1 MAG (10  $\mu$ M) treatment. n = 5/group. Technical replicate with n = 3.

b) Transactivation of PPAR $\alpha$ , PPAR $\beta$ , or PPAR $\gamma$  by C18:1 MAG (10  $\mu$ M) or C16:0 MAG (10  $\mu$ M). PPAR transactivation assay was done in 293T cells, transfected with plasmids expressing PPAR $\alpha$ , PPAR $\beta$ , or PPAR $\gamma$ , using dual luciferase PPRE reporter assay. n = 3/group. \* $P$  < 0.05; \*\* $P$  < 0.01; \*\*\* $P$  < 0.001

(one-way ANOVA test) versus vehicle (DMSO) group. Technical replicate with  $n = 3$ .

c, d) Expression of PPAR $\alpha$  and PPAR $\gamma$  target genes in shControl/shABHD6 SPC-A-1 and A549 cells, which can be suppressed by 1  $\mu$ M GW6471 c) or 1  $\mu$ M T0070907 d) treatments.  $n = 5$ /group.  $*P < 0.05$ ;  $**P < 0.01$ ;  $***P < 0.001$  (one-way ANOVA test) versus shControl group.  $\#P < 0.05$ ;  $\##P < 0.01$ ;  $\###P < 0.001$  (one-way ANOVA test) versus shABHD6 group. Technical replicate with  $n = 3$ .

e) Expression of EMT markers after treatment by antagonist of PPAR $\gamma$  or PPAR $\alpha$  in NSCLC cells.  $n = 5$ /group.  $*P < 0.05$ ;  $**P < 0.01$ ;  $***P < 0.001$  (one-way ANOVA test) versus parental group. Technical replicate with  $n = 3$ .

f) ABHD6 blockade impairs the tumor growth, which can be rescued by GW6471 (1 mg/kg body weight) and T0070907 (1 mg/kg body weight) treatments in SPC-A-1 and A549 cells (second cohort).  $n = 5$ /group.  $*P < 0.05$  (one-way ANOVA test) versus shControl group.  $\#P < 0.05$ ;  $\##P < 0.01$  (one-way ANOVA test) versus shABHD6 group. Data are presented as means  $\pm$  SD.

**Figure S1**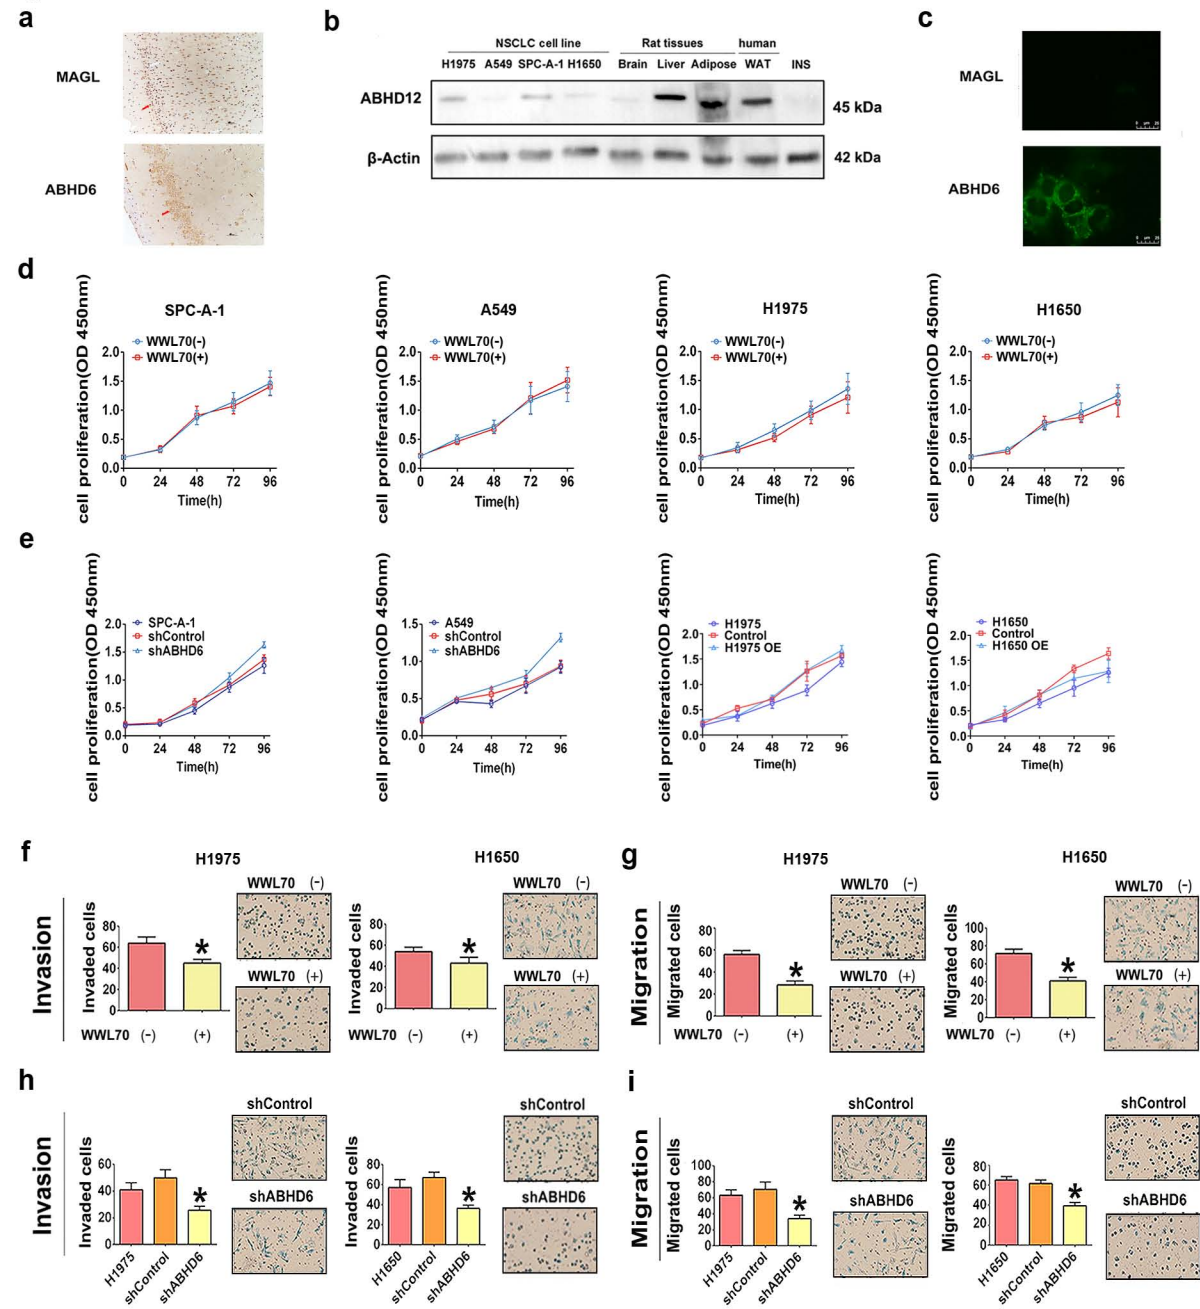

Figure S2

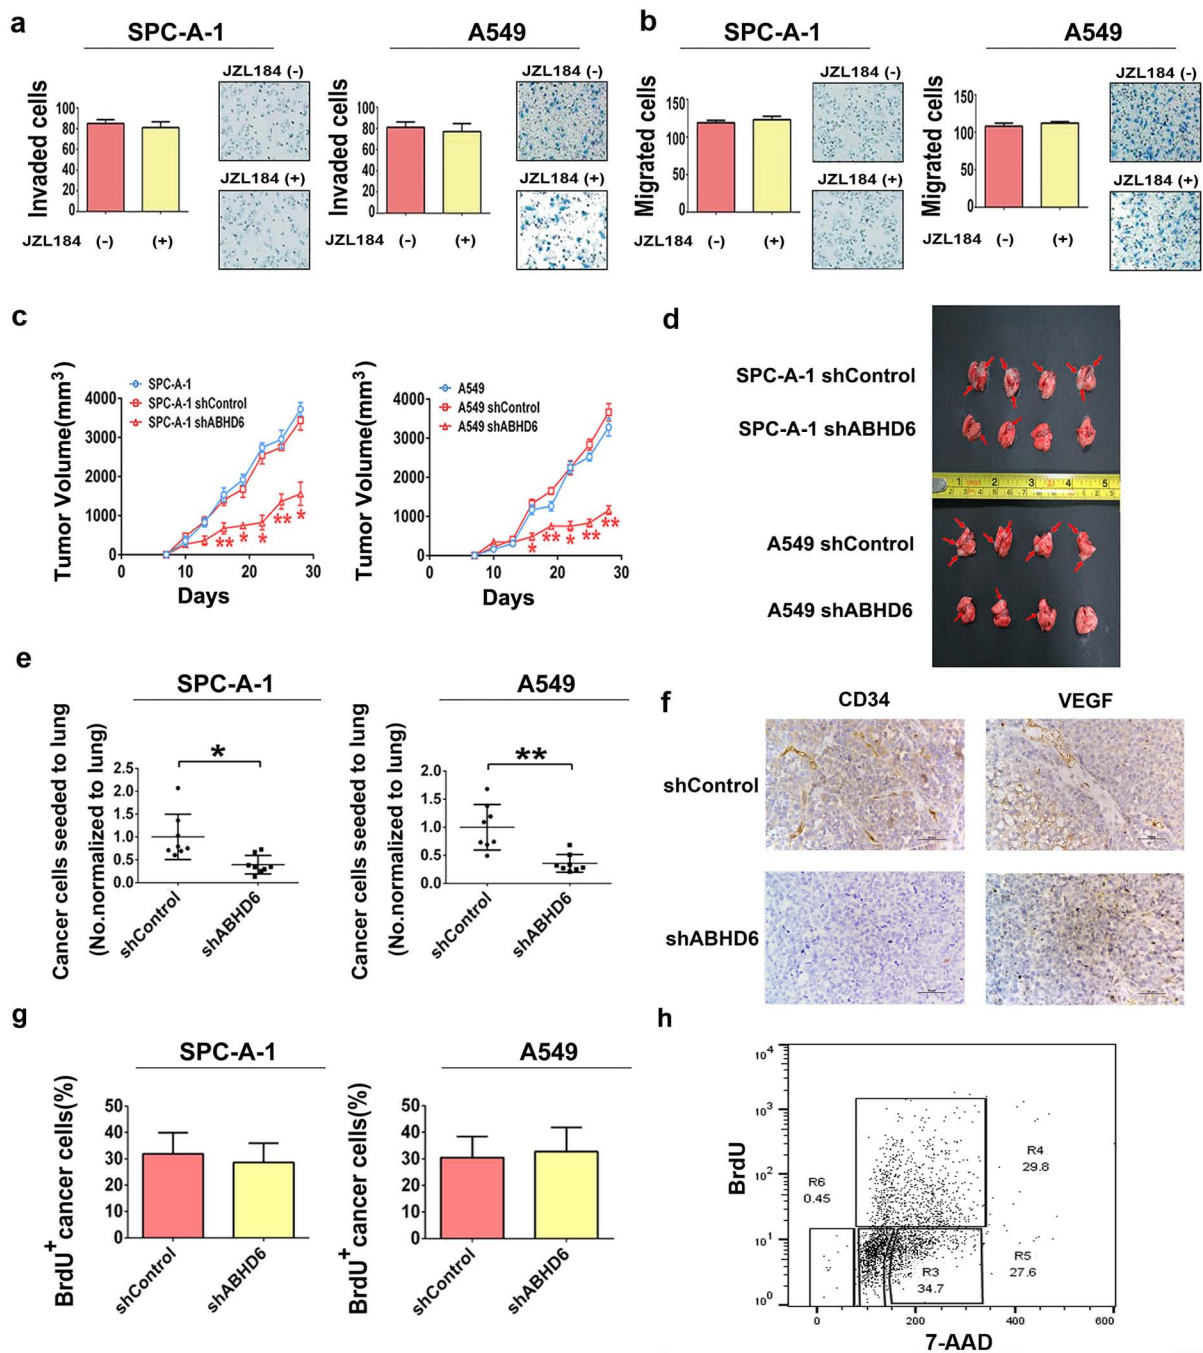

Figure S3

a

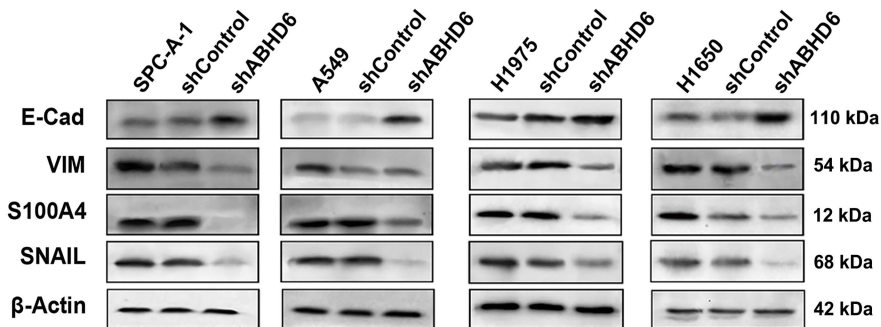

b

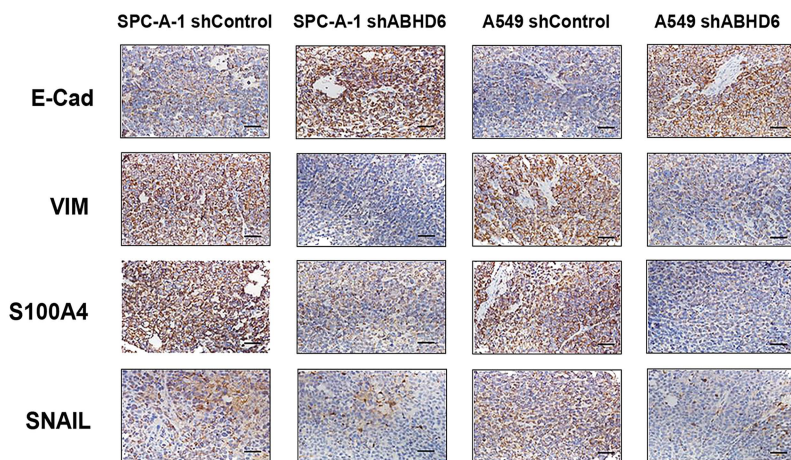

c

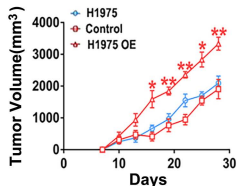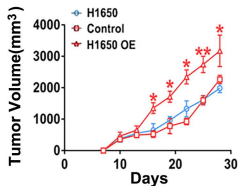

d

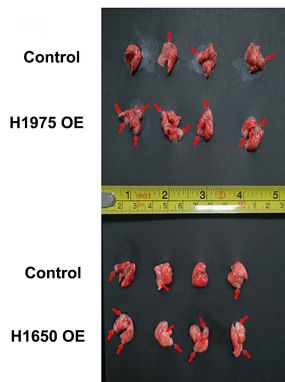



Figure S4

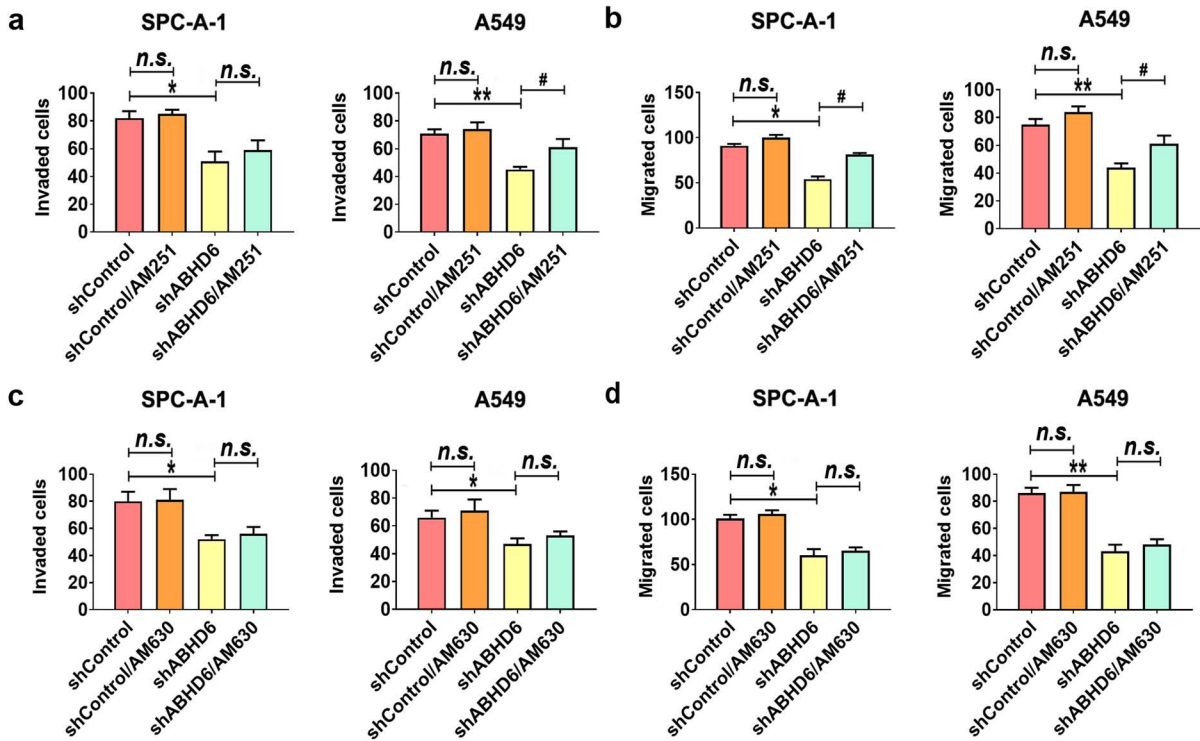

**Figure S5**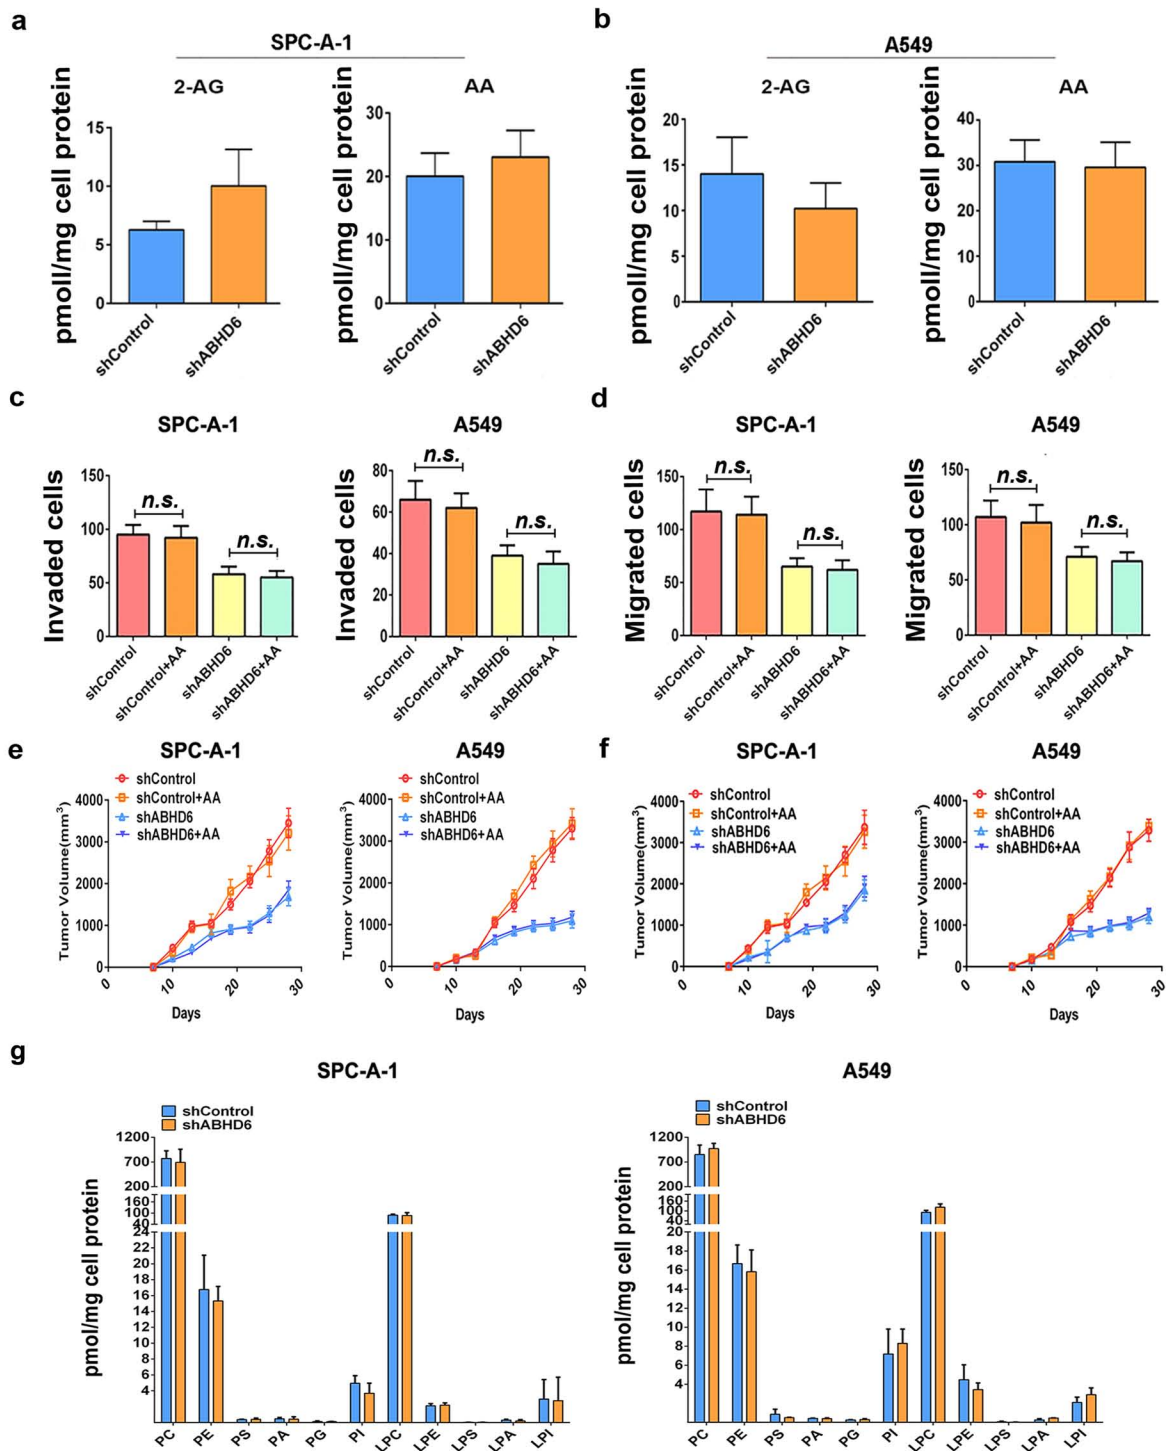

**Figure S6**

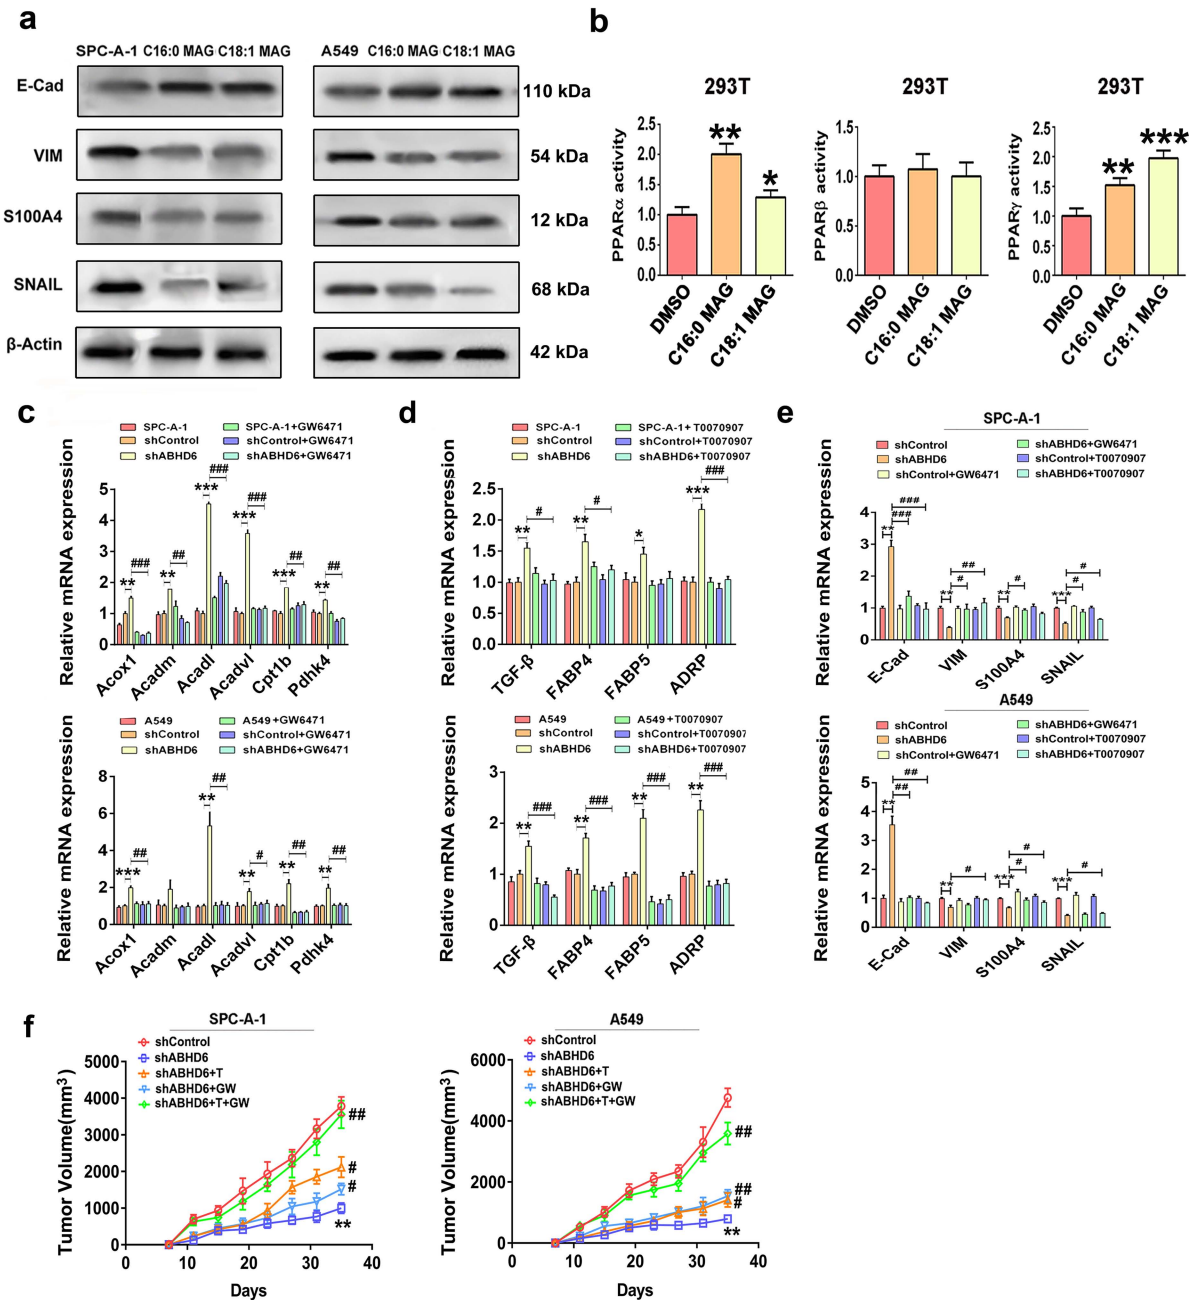

Table S1. The clinical characteristics of these patients in a concise excel table.

| Point Locz | Pathology Number | Pathological Type | Clinic Symptoms     | Survival Time( Month | death | sex      | age    | smoke | Histological type | Differentiation          | T stage |     |
|------------|------------------|-------------------|---------------------|----------------------|-------|----------|--------|-------|-------------------|--------------------------|---------|-----|
| D8         | 606674           | carcinoma         | health examination  | 13.5                 | 13.5  | death    | male   | 50    | Yes               | adenocarcinoma           | low     | T1a |
| A6         | 706309           | carcinoma         | chest tightness     | 72.33                | 62    | survival | male   | 52    | No                | squamous cell carcinoma  | high    | T1a |
| F6         | 711602           | carcinoma         | health examination  | 68.67                | 62    | survival | male   | 79    | No                | adenosquamous carcinoma. | medium  | T1a |
| F1         | 609009           | carcinoma         | health examination  | 50.43                | 50.43 | survival | female | 63    | No                | adenocarcinoma           | low     | T1a |
| C3         | 910090           | carcinoma         | bloody sputum       | 47.02                | 47.02 | survival | male   | 72    | No                | squamous cell carcinoma  | low     | T1a |
| B2         | 907126           | carcinoma         | irritable cough     | 20.77                | 20.77 | death    | female | 83    | No                | adenosquamous carcinoma. | medium  | T1b |
| D7         | 817097           | carcinoma         | weak and emaciation | 11                   | 11    | death    | male   | 62    | No                | squamous cell carcinoma  | medium  | T1b |
| B4         | 615173           | carcinoma         | bloody sputum       | 77.73                | 62    | survival | male   | 63    | Yes               | squamous cell carcinoma  | medium  | T1b |
| G6         | 712394           | carcinoma         | health examination  | 60.17                | 60.17 | survival | male   | 74    | Yes               | squamous cell carcinoma  | low     | T1b |
| E7         | 607167           | carcinoma         | health examination  | 51.53                | 51.53 | survival | female | 35    | No                | adenocarcinoma           | medium  | T1b |
| D6         | 904371           | carcinoma         | health examination  | 50.28                | 50.28 | survival | male   | 71    | No                | squamous cell carcinoma  | low     | T1b |
| B5         | 906435           | carcinoma         | chest pain          | 49.57                | 49.57 | survival | male   | 61    | No                | squamous cell carcinoma  | medium  | T1b |
| E2         | 907862           | carcinoma         | bloody sputum       | 48.37                | 48.37 | survival | male   | 67    | Yes               | squamous cell carcinoma  | low     | T1b |
| F3         | 911754           | carcinoma         | bloody sputum       | 46.37                | 46.37 | survival | male   | 61    | No                | squamous cell carcinoma  | medium  | T1b |
| E4         | 610576           | carcinoma         | health examination  | 62                   | 62    | death    | male   | 65    | No                | adenosquamous carcinoma. | high    | T2a |
| D9         | 608181           | carcinoma         | health examination  | 31.76                | 31.76 | death    | female | 76    | No                | adenocarcinoma           | low     | T2a |
| F3         | 608850           | carcinoma         | chest pain          | 22.77                | 22.77 | death    | male   | 66    | Yes               | squamous cell carcinoma  | low     | T2a |
| A3         | 612416           | carcinoma         | health examination  | 9.6                  | 9.6   | death    | male   | 81    | Yes               | adenocarcinoma           | medium  | T2a |
| C1         | 510128           | carcinoma         | hemoptysis          | 5                    | 5     | death    | male   | 69    | No                | squamous cell carcinoma  | low     | T2a |
| F4         | 609118           | carcinoma         | bloody sputum       | 82.17                | 62    | survival | male   | 62    | Yes               | adenocarcinoma           | low     | T2a |
| C8         | 715953           | carcinoma         | health examination  | 65.9                 | 62    | survival | male   | 73    | No                | adenosquamous carcinoma. | high    | T2a |
| D1         | 811361           | carcinoma         | health examination  | 65                   | 62    | survival | male   | 63    | Yes               | adenosquamous carcinoma. | high    | T2a |
| G9         | 805861           | carcinoma         | cough               | 61.27                | 61.27 | survival | female | 51    | No                | adenocarcinoma           | low     | T2a |
| D10        | 809285           | carcinoma         | health examination  | 59.23                | 59.23 | survival | male   | 69    | No                | squamous cell carcinoma  | low     | T2a |
| E1         | 608359           | carcinoma         | health examination  | 50.63                | 50.63 | survival | female | 65    | Yes               | adenocarcinoma           | medium  | T2a |
| B4         | 912773           | carcinoma         | cough               | 45.83                | 45.83 | survival | male   | 62    | Yes               | squamous cell carcinoma  | low     | T2a |
| A9         | 613765           | carcinoma         | health examination  | 45.76                | 45.76 | survival | female | 50    | No                | squamous cell carcinoma  | medium  | T2a |
| A10        | 819226           | carcinoma         | cough               | 20.01                | 20.01 | death    | male   | 80    | No                | squamous cell carcinoma  | medium  | T2b |
| A3         | 510902           | carcinoma         | health examination  | 44.8                 | 44.8  | death    | male   | 69    | No                | squamous cell carcinoma  | medium  | T2b |
| B9         | 613062           | carcinoma         | bloody sputum       | 30                   | 30    | death    | male   | 63    | Yes               | squamous cell carcinoma  | low     | T2b |
| F9         | 509735           | carcinoma         | health examination  | 26.83                | 26.83 | death    | male   | 53    | Yes               | squamous cell carcinoma  | medium  | T2b |
| B1         | 504113           | carcinoma         | health examination  | 21.27                | 21.27 | death    | male   | 62    | No                | squamous cell carcinoma  | low     | T2b |
| G3         | 610257           | carcinoma         | health examination  | 81.27                | 62    | survival | male   | 60    | Yes               | adenosquamous carcinoma. | high    | T2b |
| B2         | 602683           | carcinoma         | cough               | 65                   | 62    | survival | male   | 72    | Yes               | adenocarcinoma           | medium  | T2b |
| B9         | 514036           | carcinoma         | health examination  | 57.43                | 57.43 | survival | male   | 65    | No                | squamous cell carcinoma  | medium  | T2b |
| G1         | 811776           | carcinoma         | health examination  | 50                   | 50    | death    | male   | 71    | Yes               | squamous cell carcinoma  | low     | T2b |
| G4         | 901620           | carcinoma         | bloody sputum       | 51.97                | 51.97 | survival | male   | 68    | Yes               | squamous cell carcinoma  | high    | T3  |
| F8         | 803005           | carcinoma         | bloody sputum       | 45.57                | 45.57 | death    | male   | 63    | No                | squamous cell carcinoma  | medium  |     |
| A9         | 803207           | carcinoma         | health examination  | 62.67                | 62    | survival | female | 53    | No                | adenosquamous carcinoma. | high    |     |
| C9         | 803860           | carcinoma         | hemoptysis          | 62.6                 | 62    | survival | male   | 67    | No                | squamous cell carcinoma  | low     |     |
| A7         | 511735           | carcinoma         | health examination  | 48.2                 | 48.2  | death    | female | 72    | Yes               | squamous cell carcinoma  | low     | T1a |
| E8         | 802190           | carcinoma         | chest pain          | 44.6                 | 44.6  | death    | male   | 59    | No                | squamous cell carcinoma  | low     | T1a |
| D3         | 910855           | carcinoma         | bloody sputum       | 58.23                | 58.23 | survival | male   | 58    | Yes               | squamous cell carcinoma  | medium  | T1b |
| A8         | 816113           | carcinoma         | cough               | 55                   | 55    | death    | female | 46    | No                | adenosquamous carcinoma. | high    | T2a |
| F8         | 815646           | carcinoma         | bloody sputum       | 50                   | 50    | death    | male   | 57    | No                | squamous cell carcinoma  | low     | T2a |
| C7         | 604848           | carcinoma         | health examination  | 25.16                | 25.16 | death    | male   | 75    | No                | adenocarcinoma           | medium  | T2a |
| A9         | 511786           | carcinoma         | health examination  | 18.16                | 18.16 | death    | male   | 55    | Yes               | squamous cell carcinoma  | medium  | T2a |
| A10        | 807054           | carcinoma         | bloody sputum       | 7.7                  | 7.7   | death    | male   | 70    | No                | squamous cell carcinoma  | medium  | T2a |
| C5         | 700633           | carcinoma         | chest pain          | 6.43                 | 6.43  | death    | male   | 47    | No                | adenocarcinoma           | low     | T2a |

|     |        |           |                    |       |       |          |        |    |     |                          |        |     |
|-----|--------|-----------|--------------------|-------|-------|----------|--------|----|-----|--------------------------|--------|-----|
| C1  | 810901 | carcinoma | cough              | 58.23 | 58.23 | survival | male   | 73 | Yes | adenosquamous carcinoma. | medium | T2a |
| A3  | 909400 | carcinoma | irritable cough    | 47.63 | 47.63 | survival | female | 75 | No  | adenosquamous carcinoma. | high   | T2a |
| G4  | 613154 | carcinoma | health examination | 40.13 | 40.13 | death    | female | 68 | Yes | adenocarcinoma           | medium | T2b |
| B8  | 812920 | carcinoma | bloody sputum      | 17    | 17    | death    | male   | 54 | Yes | squamous cell carcinoma  | low    | T3  |
| G7  | 815101 | carcinoma | bloody sputum      | 55.4  | 55.4  | survival | male   | 39 | No  | adenosquamous carcinoma. | high   | T3  |
| G6  | 608843 | carcinoma | health examination | 50.63 | 50.63 | survival | male   | 66 | Yes | squamous cell carcinoma  | medium | T3  |
| B1  | 613818 | carcinoma | health examination | 45.73 | 45.73 | survival | female | 40 | Yes | adenocarcinoma           | medium | T1a |
| A5  | 612662 | carcinoma | health examination | 14.43 | 14.43 | death    | male   | 60 | No  | squamous cell carcinoma  | low    | T1b |
| A2  | 907024 | carcinoma | bloody sputum      | 31.97 | 31.97 | death    | male   | 77 | Yes | squamous cell carcinoma  | low    | T2a |
| C4  | 912938 | carcinoma | health examination | 7.33  | 7.33  | death    | male   | 77 | No  | squamous cell carcinoma  | medium | T2a |
| D2  | 604009 | carcinoma | cough              | 85.77 | 62    | survival | male   | 45 | Yes | adenosquamous carcinoma. | medium | T2a |
| C10 | 809281 | carcinoma | health examination | 59.23 | 59.23 | survival | female | 62 | No  | adenosquamous carcinoma. | high   | T2a |
| F7  | 716598 | carcinoma | cough              | 7.13  | 7.13  | death    | female | 54 | No  | squamous cell carcinoma  | medium | T2b |
| B1  | 810762 | carcinoma | chest pain         | 8.67  | 8.67  | death    | male   | 61 | Yes | adenosquamous carcinoma. | low    | T3  |
| A6  | 903787 | carcinoma | bloody sputum      | 45    | 45    | death    | male   | 60 | No  | adenocarcinoma           | low    | T4  |
| A3  | 818185 | carcinoma | hemoptysis         | 45    | 45    | death    | male   | 54 | Yes | adenosquamous carcinoma. | high   | T2a |
| F1  | 611879 | carcinoma | health examination | 47.93 | 47.93 | survival | male   | 43 | Yes | 4                        | medium | T1b |
| C2  | 603258 | carcinoma | bloody sputum      | 16.17 | 16.17 | death    | male   | 58 | No  | squamous cell carcinoma  | low    | T2a |
| A1  | 809594 | carcinoma | cough              | 54.63 | 54.63 | death    | male   | 56 | No  | adenosquamous carcinoma. | high   | T2a |
| A5  | 503788 | carcinoma | health examination | 18.5  | 18.5  | death    | male   | 68 | Yes | squamous cell carcinoma  | low    | T1b |
| A3  | 503785 | carcinoma | health examination | 49.53 | 49.53 | death    | male   | 51 | Yes | adenocarcinoma           | medium | T2a |
| A1  | 503528 | carcinoma | health examination | 43.63 | 43.63 | death    | female | 74 | No  | adenocarcinoma           | medium | T1a |
| F1  | 508799 | carcinoma | health examination | 39.6  | 39.6  | death    | male   | 68 | Yes | squamous cell carcinoma  | low    | T1b |
| E3  | 903134 | carcinoma | chest pain         | 50.9  | 50.9  | survival | male   | 61 | No  | adenosquamous carcinoma. |        | T1b |
| F2  | 907968 | carcinoma | bloody sputum      | 48.4  | 48.4  | survival | male   | 60 | No  | adenosquamous carcinoma. |        | T1a |
| C4  | 610256 | carcinoma | health examination | 26.13 | 26.13 | death    | male   | 56 | No  | adenocarcinoma           | medium | T1b |
| E4  | 902250 | carcinoma | cough              | 14.6  | 14.6  | death    | male   | 71 | No  | squamous cell carcinoma  | medium | T2a |
| A4  | 608851 | carcinoma | bloody sputum      | 49.9  | 49.9  | death    | female | 47 | No  | adenosquamous carcinoma. | high   | T2a |
| A5  | 901493 | carcinoma | cough              | 51.86 | 51.86 | survival | male   | 61 | No  | squamous cell carcinoma  | low    | T2b |
| G5  | 703206 | carcinoma | bloody sputum      | 7.17  | 7.17  | death    | male   | 69 | No  | squamous cell carcinoma  | medium | T3  |
| A2  | 601753 | carcinoma | chest pain         | 26    | 26    | death    | male   | 61 | No  | squamous cell carcinoma  | medium | T1a |
| B3  | 614316 | carcinoma | bloody sputum      | 30    | 30    | death    | male   | 74 | No  | squamous cell carcinoma  | medium | T1b |
| C5  | 505590 | carcinoma | health examination | 64.13 | 62    | survival | male   | 35 | Yes | adenocarcinoma           | medium | T2a |
| D4  | 902338 | carcinoma | hemoptysis         | 51.47 | 51.47 | survival | male   | 60 | No  | squamous cell carcinoma  | low    | T2a |
| E3  | 513682 | carcinoma | health examination | 57.76 | 57.76 | survival | male   | 62 | Yes | squamous cell carcinoma  | medium | T3  |
| B9  | 803709 | carcinoma | health examination | 62.43 | 62    | survival | male   | 69 | No  | adenosquamous carcinoma. | high   | T1a |
| E2  | 606231 | carcinoma | bloody sputum      | 84.23 | 62    | survival | male   | 62 | No  | squamous cell carcinoma  | medium | T1b |
| F10 | 500083 | carcinoma | bloody sputum      | 72    | 62    | death    | male   | 73 | Yes | squamous cell carcinoma  | medium | T2a |
| B1  | 608899 | carcinoma | chest pain         | 30    | 30    | death    | male   | 57 | Yes | adenosquamous carcinoma. | high   | T2a |
| F7  | 606232 | carcinoma | health examination | 54.03 | 54.03 | survival | male   | 52 | Yes | adenocarcinoma           | medium | T2a |
| A4  | 912333 | carcinoma | health examination | 46.07 | 46.07 | survival | male   | 71 | No  | squamous cell carcinoma  | medium | T2a |
| E1  | 900159 | carcinoma | cough              | 52.73 | 52.73 | survival | female | 66 | No  | squamous cell carcinoma  | low    | T2a |
| E8  | 814791 | carcinoma | chest pain         | 55.77 | 55.77 | survival | male   | 65 | No  | squamous cell carcinoma  | medium | T2b |
| A5  | 701189 | carcinoma | bloody sputum      | 39.03 | 39.03 | death    | male   | 78 | Yes | squamous cell carcinoma  | medium | T1a |
| C9  | 505693 | carcinoma | health examination | 64.17 | 62    | survival | male   | 58 | Yes | adenocarcinoma           | high   | T1b |
| B10 | 808410 | carcinoma | health examination | 59.73 | 59.73 | survival | male   | 71 | No  | squamous cell carcinoma  | low    | T1b |
| C9  | 615932 | carcinoma | health examination | 45.03 | 45.03 | survival | female | 59 | Yes | adenocarcinoma           | medium | T1b |
| E7  | 816409 | carcinoma | bloody sputum      | 50    | 50    | death    | female | 69 | No  | adenocarcinoma           | low    | T2a |
| D7  | 715382 | carcinoma | bloody sputum      | 2.07  | 2.07  | death    | female | 61 | No  | adenosquamous carcinoma. | high   | T2a |
| D1  | 505748 | carcinoma | health examination | 64    | 62    | survival | male   | 68 | Yes | squamous cell carcinoma  | medium | T2a |
| E3  | 910757 | carcinoma | bloody sputum      | 46.9  | 46.9  | survival | male   | 74 | No  | squamous cell carcinoma  | medium | T2a |

|     |        |           |                    |       |       |          |        |    |     |                          |        |     |
|-----|--------|-----------|--------------------|-------|-------|----------|--------|----|-----|--------------------------|--------|-----|
| D5  | 700041 | carcinoma | bloody sputum      | 2.02  | 2.02  | death    | male   | 75 | No  | adenocarcinoma           | low    | T3  |
| F5  | 903300 | carcinoma | bloody sputum      | 37.02 | 37.02 | death    | male   | 55 | Yes | squamous cell carcinoma  | low    | T1b |
| D2  | 818291 | carcinoma | health examination | 2.43  | 2.43  | death    | male   | 74 | Yes | adenosquamous carcinoma. | medium | T1b |
| E3  | 607869 | carcinoma | bloody sputum      | 3.93  | 3.93  | death    | male   | 78 | Yes | adenosquamous carcinoma. | high   | T2a |
| C2  | 907306 | carcinoma | cough              | 48.77 | 48.77 | survival | male   | 53 | No  | squamous cell carcinoma  | medium | T2a |
| B2  | 817524 | carcinoma | hemoptysis         | 1     | 1     | death    | male   | 63 | No  | squamous cell carcinoma  | low    | T1a |
| A7  | 612721 | carcinoma | health examination | 30.4  | 30.4  | death    | female | 55 | No  | adenocarcinoma           | medium | T2a |
| D9  | 803961 | carcinoma | cough              | 20.03 | 20.03 | death    | male   | 59 | Yes | adenocarcinoma           | medium | T2a |
| A2  | 818120 | carcinoma | hemoptysis         | 25.47 | 25.47 | death    | male   | 55 | No  | squamous cell carcinoma  | medium | T1a |
| D9  | 600203 | carcinoma | bloody sputum      | 88.83 | 62    | survival | male   | 71 | No  | squamous cell carcinoma  | medium | T1a |
| E1  | 511496 | carcinoma | bloody sputum      | 59.6  | 59.6  | death    | male   | 59 | Yes | squamous cell carcinoma  | medium | T2a |
| B7  | 504818 | carcinoma | health examination | 52.67 | 52.67 | death    | male   | 56 | No  | squamous cell carcinoma  | medium | T2a |
| D5  | 902890 | carcinoma | cough              | 50    | 50    | death    | female | 59 | No  | adenosquamous carcinoma. | medium | T2a |
| B7  | 817729 | carcinoma | bloody sputum      | 45    | 45    | death    | male   | 71 | Yes | adenocarcinoma           | medium | T2a |
| D9  | 506500 | carcinoma | health examination | 41.7  | 41.7  | death    | female | 52 | Yes | adenocarcinoma           | high   | T2a |
| F1  | 811461 | carcinoma | health examination | 16.33 | 16.33 | death    | male   | 65 | Yes | adenosquamous carcinoma. | medium | T2a |
| G2  | 817858 | carcinoma | hemoptysis         | 5.87  | 5.87  | death    | male   | 60 | Yes | adenosquamous carcinoma. | low    | T2a |
| F9  | 805350 | carcinoma | bloody sputum      | 61.53 | 61.53 | survival | male   | 51 | Yes | squamous cell carcinoma  | medium | T2a |
| F4  | 902248 | carcinoma | hemoptysis         | 51.5  | 51.5  | survival | male   | 73 | Yes | squamous cell carcinoma  | medium | T2a |
| C6  | 904163 | carcinoma | bloody sputum      | 50.33 | 50.33 | survival | male   | 68 | No  | squamous cell carcinoma  | low    | T2a |
| C8  | 812752 | carcinoma | cough              | 50    | 50    | death    | male   | 76 | No  | squamous cell carcinoma  | low    | T2b |
| G5  | 903517 | carcinoma | bloody sputum      | 45    | 45    | death    | male   | 67 | No  | squamous cell carcinoma  | medium | T2b |
| C7  | 816942 | carcinoma | bloody sputum      | 22.03 | 22.03 | death    | male   | 66 | No  | squamous cell carcinoma  | medium | T2b |
| F1  | 511596 | carcinoma | bloody sputum      | 91.37 | 62    | survival | male   | 77 | Yes | adenocarcinoma           | medium | T3  |
| F6  | 906355 | carcinoma | bloody sputum      | 12.5  | 12.5  | death    | male   | 54 | No  | adenosquamous carcinoma. | medium | T4  |
| A1  | 500651 | carcinoma | chest pain         | 18.43 | 18.43 | death    | female | 44 | No  | adenosquamous carcinoma. | medium | T1b |
| A1  | 605523 | carcinoma | chest pain         | 68.63 | 62    | death    | male   | 64 | No  | squamous cell carcinoma  | medium | T2a |
| C3  | 505443 | carcinoma | health examination | 34.23 | 34.23 | death    | male   | 61 | Yes | squamous cell carcinoma  | low    | T2a |
| C1  | 505306 | carcinoma | health examination | 27.37 | 27.37 | death    | male   | 63 | No  | squamous cell carcinoma  | low    | T2a |
| D7  | 608015 | carcinoma | health examination | 27.86 | 27.86 | death    | male   | 70 | No  | adenocarcinoma           | medium | T2b |
| G3  | 509430 | carcinoma | health examination | 5     | 5     | death    | male   | 75 | No  | squamous cell carcinoma  | low    | T1a |
| F9  | 906472 | carcinoma | health examination | 45    | 45    | death    | male   | 62 | No  | adenosquamous carcinoma. | medium | T1b |
| D1  | 504688 | carcinoma | health examination | 8.77  | 8.77  | death    | male   | 65 | Yes | squamous cell carcinoma  | low    | T1b |
| F9  | 609954 | carcinoma | health examination | 34.46 | 34.46 | death    | male   | 71 | Yes | squamous cell carcinoma  | medium | T2a |
| D8  | 811973 | carcinoma | cough              | 10.27 | 10.27 | death    | female | 63 | No  | adenosquamous carcinoma. | medium | T2a |
| E5  | 615540 | carcinoma | bloody sputum      | 16.03 | 16.03 | death    | male   | 62 | Yes | adenosquamous carcinoma. | high   | T2a |
| G9  | 818978 | carcinoma | health examination | 3.17  | 3.17  | death    | male   | 52 | Yes | squamous cell carcinoma  | medium | T2b |
| D1  | 600068 | carcinoma | hemoptysis         | 88.93 | 62    | survival | male   | 73 | Yes | adenosquamous carcinoma. | high   | T2b |
| E9  | 818361 | carcinoma | health examination | 18.77 | 18.77 | death    | male   | 71 | Yes | squamous cell carcinoma  | medium | T3  |
| G8  | 803011 | carcinoma | bloody sputum      | 4.07  | 4.07  | death    | male   | 61 | No  | adenocarcinoma           | low    | T2a |
| B3  | 818365 | carcinoma | bloody sputum      | 53.77 | 53.77 | survival | male   | 58 | No  | adenocarcinoma           | low    | T3  |
| C7  | 615802 | carcinoma | health examination | 5.13  | 5.13  | death    | male   | 70 | Yes | adenocarcinoma           | medium | T1b |
| D7  | 509502 | carcinoma | health examination | 60.93 | 60.93 | survival | female | 68 | No  | adenocarcinoma           | medium | T1b |
| G2  | 908046 | carcinoma | health examination | 40    | 40    | death    | male   | 67 | No  | squamous cell carcinoma  | medium | T2a |
| A5  | 511597 | carcinoma | health examination | 13.33 | 13.33 | death    | female | 73 | Yes | squamous cell carcinoma  | low    | T2a |
| B1  | 512302 | carcinoma | health examination | 31.8  | 31.8  | death    | male   | 71 | Yes | adenocarcinoma           | medium | T2b |
| G1  | 509278 | carcinoma | health examination | 15.17 | 15.17 | death    | female | 59 | No  | adenosquamous carcinoma. | high   | T2b |
| A3  | 614552 | carcinoma | hemoptysis         | 10    | 10    | death    | male   | 58 | Yes | squamous cell carcinoma  | medium | T2a |
| E1  | 513332 | carcinoma | health examination | 9.06  | 9.06  | death    | female | 69 | Yes | adenocarcinoma           | low    | T2a |
| E6  | 906084 | carcinoma | cough              | 8.93  | 8.93  | death    | female | 50 | No  | adenosquamous carcinoma. | low    | T2a |
| E10 | 700117 | carcinoma | bloody sputum      | 76.87 | 62    | survival | female | 55 | Yes | adenosquamous carcinoma. | high   | T2a |

|    |        |           |                     |       |       |          |        |    |     |                          |        |     |
|----|--------|-----------|---------------------|-------|-------|----------|--------|----|-----|--------------------------|--------|-----|
| B3 | 909461 | carcinoma | bloody sputum       | 14.03 | 14.03 | death    | male   | 58 | Yes | adenosquamous carcinoma. | high   | T3  |
| C5 | 603586 | carcinoma | health examination  | 53.97 | 53.97 | survival | male   | 62 | Yes | adenocarcinoma           | high   | T1a |
| C7 | 715311 | carcinoma | health examination  | 66.03 | 62    | survival | male   | 61 | Yes | squamous cell carcinoma  | medium | T1b |
| C6 | 710648 | carcinoma | bloody sputum       | 15.93 | 15.93 | death    | male   | 69 | No  | squamous cell carcinoma  | medium | T2a |
| B5 | 613889 | carcinoma | health examination  | 35.7  | 35.7  | death    | male   | 64 | Yes | adenosquamous carcinoma. | medium | T1a |
| B6 | 710917 | carcinoma | chest pain          | 9.53  | 9.53  | death    | female | 55 | No  | adenosquamous carcinoma. | medium | T1b |
| E7 | 508315 | carcinoma | health examination  | 8.97  | 8.97  | death    | male   | 75 | Yes | adenocarcinoma           | medium | T2a |
| G5 | 610726 | carcinoma | health examination  | 48.93 | 48.93 | survival | male   | 62 | Yes | squamous cell carcinoma  | medium | T2a |
| G3 | 912061 | carcinoma | health examination  | 27.77 | 27.77 | death    | male   | 52 | No  | adenosquamous carcinoma. | medium | T1a |
| B7 | 513939 | carcinoma | health examination  | 47.53 | 47.53 | death    | male   | 48 | Yes | squamous cell carcinoma  | medium | T1b |
| F7 | 509170 | carcinoma | health examination  | 44.23 | 44.23 | death    | male   | 72 | Yes | squamous cell carcinoma  | medium | T1b |
| A7 | 714856 | carcinoma | hemoptysis          | 55.37 | 55.37 | death    | male   | 68 | No  | squamous cell carcinoma  | medium | T2a |
| C1 | 514158 | carcinoma | health examination  | 31.3  | 31.3  | death    | male   | 58 | No  | adenosquamous carcinoma. | high   | T1a |
| B1 | 501269 | carcinoma | cough               | 12.33 | 12.33 | death    | female | 55 | No  | adenosquamous carcinoma. | medium | T2a |
| G5 | 509964 | carcinoma | health examination  | 16.6  | 16.6  | death    | male   | 81 | Yes | adenocarcinoma           | medium | T2b |
| C7 | 505671 | carcinoma | health examination  | 45.1  | 45.1  | death    | male   | 62 | Yes | adenocarcinoma           | medium | T2a |
| C9 | 713262 | carcinoma | weak and emaciation | 9.03  | 9.03  | death    | male   | 62 | No  | adenocarcinoma           | medium | T1a |
| G1 | 508800 | carcinoma | chest tightness     | 85    | 62    | death    | male   | 56 | Yes | adenosquamous carcinoma. | medium | T1b |
| E5 | 508248 | carcinoma | health examination  | 5.03  | 5.03  | death    | male   | 59 | Yes | adenocarcinoma           | low    | T1b |
| D5 | 506045 | carcinoma | health examination  | 63.93 | 62    | survival | female | 50 | Yes | adenocarcinoma           | medium | T1b |
| C2 | 818363 | carcinoma | health examination  | 53.77 | 53.77 | survival | male   | 45 | No  | squamous cell carcinoma  | medium | T1b |
| E5 | 605689 | carcinoma | health examination  | 14.56 | 14.56 | death    | male   | 74 | Yes | adenosquamous carcinoma. | low    | T2a |
| C5 | 615083 | carcinoma | health examination  | 44.8  | 44.8  | survival | male   | 58 | Yes | adenocarcinoma           | low    | T2b |
| G3 | 610541 | carcinoma | health examination  | 15.03 | 15.03 | death    | male   | 57 | No  | squamous cell carcinoma  | high   | T4  |
| D3 | 910399 | carcinoma | bloody sputum       | 40    | 40    | death    | female | 73 | No  | squamous cell carcinoma  | low    | T4  |
| E9 | 508693 | carcinoma | health examination  | 14.76 | 14.76 | death    | female | 74 | Yes | adenocarcinoma           | medium | T1b |
| B5 | 504687 | carcinoma | health examination  | 64.8  | 62    | survival | male   | 60 | No  | squamous cell carcinoma  | medium | T1b |
| E3 | 608416 | carcinoma | health examination  | 25.66 | 25.66 | death    | female | 53 | Yes | adenocarcinoma           | low    | T2a |
| D2 | 907407 | carcinoma | bloody sputum       | 23    | 23    | death    | male   | 78 | No  | squamous cell carcinoma  | medium | T2a |
| A7 | 503950 | carcinoma | health examination  | 10.37 | 10.37 | death    | male   | 72 | Yes | adenocarcinoma           | high   | T2a |
| B3 | 613888 | carcinoma | health examination  | 45.7  | 45.7  | survival | male   | 62 | Yes | adenocarcinoma           | medium | T2a |
| D3 | 506499 | carcinoma | health examination  | 64.83 | 62    | death    | male   | 63 | No  | adenosquamous carcinoma. | high   | T2b |
| A9 | 504008 | carcinoma | health examination  | 57.33 | 57.33 | death    | female | 56 | No  | adenocarcinoma           | medium | T2a |
| B7 | 715083 | carcinoma | cough               | 46.77 | 46.77 | death    | male   | 53 | Yes | adenosquamous carcinoma. | medium | T2a |
| B6 | 903864 | carcinoma | hemoptysis          | 36    | 36    | death    | male   | 61 | No  | adenocarcinoma           | medium | T2a |
| G6 | 906357 | carcinoma | bloody sputum       | 17.37 | 17.37 | death    | male   | 72 | Yes | squamous cell carcinoma  | medium | T2a |
| F2 | 606099 | carcinoma | cough               | 21.2  | 21.2  | death    | male   | 64 | Yes | adenocarcinoma           | medium | T3  |
| E6 | 711015 | carcinoma | health examination  | 49.8  | 49.8  | death    | female | 60 | No  | adenocarcinoma           | medium | T1b |
| D3 | 606463 | carcinoma | health examination  | 13.03 | 13.03 | death    | female | 72 | Yes | adenocarcinoma           | medium | T2a |
| E9 | 804451 | carcinoma | health examination  | 20.13 | 20.13 | death    | female | 52 | No  | adenocarcinoma           | low    | T2a |
| D3 | 612151 | carcinoma | cough               | 10    | 10    | death    | male   | 48 | No  | adenosquamous carcinoma. | low    | T2b |
| A1 | 510669 | carcinoma | health examination  | 13.76 | 13.76 | death    | female | 73 | No  | adenocarcinoma           | medium | T1b |
| B8 | 715864 | carcinoma | health examination  | 65.9  | 62    | survival | female | 44 | No  | adenosquamous carcinoma. | high   | T1a |
| F5 | 508961 | carcinoma | health examination  | 41.43 | 41.43 | death    | female | 60 | Yes | squamous cell carcinoma  | medium | T1b |
| E5 | 903136 | carcinoma | health examination  | 50.9  | 50.9  | survival | female | 70 | No  | adenosquamous carcinoma. | medium | T1b |
| F9 | 509223 | carcinoma | health examination  | 24.2  | 24.2  | death    | female | 74 | No  | adenocarcinoma           | medium | T2a |
| D3 | 505842 | carcinoma | health examination  | 54    | 54    | death    | male   | 72 | Yes | squamous cell carcinoma  | medium | T2b |
| C3 | 901365 | carcinoma | bloody sputum       | 48    | 48    | death    | female | 55 | No  | squamous cell carcinoma  | low    | T2b |
| F7 | 609953 | carcinoma | health examination  | 15.46 | 15.46 | death    | male   | 63 | No  | adenocarcinoma           | low    | T4  |
| F3 | 609268 | carcinoma | health examination  | 32.54 | 32.54 | death    | male   | 61 | Yes | squamous cell carcinoma  | low    | T1a |
| F5 | 702391 | carcinoma | cough               | 14.63 | 14.63 | death    | female | 75 | No  | adenosquamous carcinoma. | low    | T1b |

|    |        |           |                    |       |       |       |      |    |     |                         |        |     |
|----|--------|-----------|--------------------|-------|-------|-------|------|----|-----|-------------------------|--------|-----|
| G7 | 510604 | carcinoma | health examination | 8.1   | 8.1   | death | male | 62 | Yes | adenocarcinoma          | low    | T1b |
| B3 | 504585 | carcinoma | health examination | 60.83 | 60.83 | death | male | 57 | Yes | squamous cell carcinoma | low    | T2a |
| A9 | 815177 | carcinoma | hemoptysis         | 8.53  | 8.53  | death | male | 71 | No  | adenocarcinoma          | medium | T1b |
| B3 | 512869 | carcinoma | health examination | 17.46 | 17.46 | death | male | 52 | Yes | adenocarcinoma          | medium | T2b |





|    |    |         |    |   |    |    |
|----|----|---------|----|---|----|----|
| N1 | M0 | T2aN1M0 | 2a | 0 | 0  | 0  |
| N1 | M0 | T2aN1M0 | 2a | 0 | 0  | 0  |
| N1 | M0 | T2bN1M0 | 2b | 0 | 0  | 0  |
| N1 | M0 | T3N1M0  | 3a | 0 | 0  | 0  |
| N1 | M0 | T3N1M0  | 3a | 0 | 0  | 0  |
| N1 | M0 | T3N1M0  | 3a | 0 | 0  | 0  |
| N2 | M0 | T1aN2M0 | 3a | 0 | 0  | 0  |
| N2 | M0 | T1bN2M0 | 3a | 0 | 0  | 0  |
| N2 | M0 | T2aN2M0 | 3a | 0 | 0  | 0  |
| N2 | M0 | T2aN2M0 | 3a | 0 | 0  | 0  |
| N2 | M0 | T2aN2M0 | 3a | 0 | 0  | 0  |
| N2 | M0 | T2aN2M0 | 3a | 0 | 0  | 0  |
| N2 | M0 | T2bN2M0 | 3a | 0 | 0  | 0  |
| N2 | M0 | T3N2M0  | 3a | 0 | 0  | 0  |
| N2 | M0 | T4N2M0  | 3b | 0 | 0  | 0  |
| N2 | M0 | T2aN2M0 | 3a | 1 | 10 | 10 |
| N0 | M0 | T1bN0M0 | 1a | 1 | 20 | 20 |
| N2 | M0 | T2aN2M0 | 3a | 1 | 20 | 20 |
| N0 | M0 | T2aN0M0 | 1b | 1 | 30 | 30 |
| N1 | M0 | T1bN1M0 | 2a | 1 | 30 | 30 |
| N2 | M0 | T2aN2M0 | 3a | 1 | 30 | 30 |
| N0 | M0 | T1aN0M0 | 1a | 1 | 40 | 40 |
| N0 | M0 | T1bN0M0 | 1a | 1 | 40 | 40 |
| N0 | M0 | T1N0M0  | 1a | 1 | 40 | 40 |
| N1 | M0 | T1N1M0  | 2a | 1 | 40 | 40 |
| N1 | M0 | T1N1M0  | 2a | 1 | 40 | 40 |
| N1 | M0 | T2aN1M0 | 2a | 1 | 40 | 40 |
| N2 | M0 | T2aN2M0 | 3a | 1 | 40 | 40 |
| N2 | M0 | T2bN2M0 | 3a | 1 | 40 | 40 |
| N2 | M0 | T3N2M0  | 3a | 1 | 40 | 40 |
| N0 | M0 | T1N0M0  | 1a | 1 | 60 | 60 |
| N0 | M0 | T1bN0M0 | 1a | 1 | 60 | 60 |
| N0 | M0 | T2aN0M0 | 1b | 3 | 20 | 60 |
| N0 | M0 | T2N0M0  | 1b | 1 | 60 | 60 |
| N1 | M0 | T3N1M0  | 3a | 1 | 60 | 60 |
| N0 | M0 | T1N0M0  | 1a | 1 | 70 | 70 |
| N0 | M0 | T1N0M0  | 1a | 1 | 70 | 70 |
| N0 | M0 | T2aN0M0 | 1b | 1 | 70 | 70 |
| N1 | M0 | T2aN1M0 | 1b | 1 | 70 | 70 |
| N1 | M0 | T2aN1M0 | 2a | 1 | 70 | 70 |
| N1 | M0 | T2aN1M0 | 2a | 1 | 70 | 70 |
| N2 | M0 | T2aN2M0 | 3a | 1 | 70 | 70 |
| N2 | M0 | T2bN2M0 | 3a | 1 | 70 | 70 |
| N0 | M0 | T1N0M0  | 1a | 1 | 80 | 80 |
| N0 | M0 | T1bN0M0 | 1a | 1 | 80 | 80 |
| N0 | M0 | T1N0M0  | 1a | 2 | 40 | 80 |
| N0 | M0 | T1bN0M0 | 1a | 1 | 80 | 80 |
| N0 | M0 | T2aN0M0 | 1b | 1 | 80 | 80 |
| N0 | M0 | T2aN0M0 | 1b | 1 | 80 | 80 |
| N0 | M0 | T2aN0M0 | 1b | 2 | 40 | 80 |
| N0 | M0 | T2aN0M0 | 1b | 1 | 80 | 80 |

|    |    |         |    |   |     |     |
|----|----|---------|----|---|-----|-----|
| N0 | M0 | T3N0M0  | 2b | 1 | 80  | 80  |
| N1 | M0 | T1N1M0  | 2a | 1 | 80  | 80  |
| N1 | M0 | T1N1M0  | 2a | 1 | 80  | 80  |
| N1 | M0 | T2aN1M0 | 2a | 1 | 80  | 80  |
| N1 | M0 | T2aN1M0 | 2a | 1 | 80  | 80  |
| N2 | M0 | T1N2M0  | 3a | 1 | 80  | 80  |
| N2 | M0 | T2aN2M0 | 3a | 2 | 40  | 80  |
| N2 | M0 | T2aN2M0 | 3a | 1 | 80  | 80  |
| N0 | M0 | T1N0M0  | 1a | 1 | 100 | 100 |
| N0 | M0 | T1N0M0  | 1a | 1 | 100 | 100 |
| N0 | M0 | T2aN0M0 | 1b | 1 | 100 | 100 |
| N0 | M0 | T2aN0M0 | 1b | 1 | 100 | 100 |
| N0 | M0 | T2aN0M0 | 1b | 1 | 100 | 100 |
| N0 | M0 | T2aN0M0 | 1b | 1 | 100 | 100 |
| N0 | M0 | T2aN0M0 | 1b | 1 | 100 | 100 |
| N0 | M0 | T2aN0M0 | 1b | 1 | 100 | 100 |
| N0 | M0 | T2aN0M0 | 1b | 1 | 100 | 100 |
| N0 | M0 | T2aN0M0 | 1b | 1 | 100 | 100 |
| N0 | M0 | T2aN0M0 | 1b | 2 | 50  | 100 |
| N0 | M0 | T2aN0M0 | 1b | 1 | 100 | 100 |
| N0 | M0 | T2bN0M0 | 2a | 1 | 100 | 100 |
| N0 | M0 | T2bN0M0 | 2a | 1 | 100 | 100 |
| N0 | M0 | T2bN0M0 | 2a | 1 | 100 | 100 |
| N0 | M0 | T3N0M0  | 2b | 2 | 50  | 100 |
| N0 | M0 | T4N0M0  | 3a | 1 | 100 | 100 |
| N1 | M0 | T1bN1M0 | 2a | 1 | 100 | 100 |
| N1 | M0 | T2aN1M0 | 2a | 1 | 100 | 100 |
| N1 | M0 | T2aN1M0 | 2a | 1 | 100 | 100 |
| N1 | M0 | T2aN1M0 | 2a | 1 | 100 | 100 |
| N1 | M0 | T2bN1M0 | 2b | 1 | 100 | 100 |
| N2 | M0 | T1aN2M0 | 3a | 1 | 100 | 100 |
| N2 | M0 | T1N2M0  | 3a | 1 | 100 | 100 |
| N2 | M0 | T1bN2M0 | 3a | 1 | 100 | 100 |
| N2 | M0 | T2aN2M0 | 3a | 1 | 100 | 100 |
| N2 | M0 | T2aN2M0 | 3a | 1 | 100 | 100 |
| N0 | M0 | T2aN0M0 | 2a | 2 | 60  | 120 |
| N0 | M0 | T2bN0M0 | 2a | 2 | 60  | 120 |
| N0 | M0 | T2bN0M0 | 2a | 2 | 60  | 120 |
| N0 | M0 | T3N0M0  | 2b | 2 | 60  | 120 |
| N1 | M0 | T2aN1M0 | 2a | 2 | 60  | 120 |
| N2 | M0 | T3N2M0  | 3a | 2 | 60  | 120 |
| N0 | M0 | T1bN0M0 | 1a | 2 | 70  | 140 |
| N0 | M0 | T1bN0M0 | 1a | 2 | 70  | 140 |
| N0 | M0 | T2aN0M0 | 1b | 2 | 70  | 140 |
| N0 | M0 | T2aN0M0 | 1b | 2 | 70  | 140 |
| N0 | M0 | T2bN0M0 | 2a | 2 | 70  | 140 |
| N0 | M0 | T2bN0M0 | 2a | 2 | 70  | 140 |
| N1 | M0 | T2aN1M0 | 2a | 2 | 70  | 140 |
| N1 | M0 | T2aN1M0 | 2a | 2 | 70  | 140 |
| N1 | M0 | T2aN1M0 | 2a | 2 | 70  | 140 |
| N1 | M0 | T2aN1M0 | 2a | 2 | 70  | 140 |

|    |     |         |    |   |     |     |
|----|-----|---------|----|---|-----|-----|
| N2 | M0  | T3N2Mo  | 3a | 2 | 70  | 140 |
| N0 | M0  | T1aN0M0 | 1a | 2 | 80  | 160 |
| N0 | M0  | T1N0M0  | 1a | 2 | 80  | 160 |
| N0 | M0  | T2aN0M0 | 1b | 2 | 80  | 160 |
| N1 | M0  | T1aN1M0 | 2a | 2 | 80  | 160 |
| N1 | M0  | T1bN1M0 | 2a | 2 | 80  | 160 |
| N1 | M0  | T2aN1M0 | 2a | 2 | 80  | 160 |
| N1 | M0  | T2aN1M0 | 2a | 2 | 80  | 160 |
| N2 | M0  | T1N2M0  | 3a | 2 | 80  | 160 |
| N2 | M0  | T1bN2M0 | 3a | 2 | 80  | 160 |
| N2 | M0  | T1bN2M0 | 3a | 2 | 80  | 160 |
| N2 | M0  | T2aN2M0 | 3a | 2 | 80  | 160 |
| N0 | M0  | T1aN0M0 | 1a | 2 | 90  | 180 |
| N0 | M0  | T2aN0M0 | 1b | 2 | 90  | 180 |
| N0 | M0  | T2bN0M0 | 2a | 2 | 90  | 180 |
| N2 | M0  | T2aN2M0 | 3a | 2 | 90  | 180 |
| N0 | M0  | T1N0M0  | 1a | 2 | 100 | 200 |
| N0 | M0  | T1N0M0  | 1a | 2 | 100 | 200 |
| N0 | M0  | T1bN0M0 | 1a | 2 | 100 | 200 |
| N0 | M0  | T1bN0M0 | 1a | 2 | 100 | 200 |
| N0 | M0  | T1N0M0  | 1a | 2 | 100 | 200 |
| N0 | M0  | T2aN0M0 | 1b | 2 | 100 | 200 |
| N0 | M0  | T2bN0M0 | 2a | 2 | 100 | 200 |
| N0 | M0  | T4N0M1b | 4  | 2 | 100 | 200 |
| N0 | M0  | T4N0M0  | 3a | 2 | 100 | 200 |
| N1 | M0  | T1bN1M0 | 2a | 2 | 100 | 200 |
| N1 | M0  | T1bN1M0 | 2a | 2 | 100 | 200 |
| N1 | M0  | T2aN1M0 | 2a | 2 | 100 | 200 |
| N1 | M0  | T2aN1M0 | 2a | 2 | 100 | 200 |
| N1 | M0  | T2aN1M0 | 2a | 2 | 100 | 200 |
| N1 | M0  | T2aN1M0 | 2a | 2 | 100 | 200 |
| N1 | M0  | T2aN1M0 | 2a | 2 | 100 | 200 |
| N1 | M0  | T2bN1M0 | 2b | 2 | 100 | 200 |
| N2 | M0  | T2aN2M0 | 3a | 2 | 100 | 200 |
| N2 | M0  | T2aN2M0 | 3a | 2 | 100 | 200 |
| N2 | M0  | T2aN2M0 | 3a | 2 | 100 | 200 |
| N2 | M0  | T2aN2M0 | 3a | 2 | 100 | 200 |
| N2 | M1a | T3N2M1a | 4  | 2 | 100 | 200 |
| N0 | M0  | T1N0M0  | 1a | 3 | 70  | 210 |
| N0 | M0  | T2aN0M0 | 1b | 3 | 70  | 210 |
| N1 | M0  | T2aN1M0 | 2a | 3 | 80  | 240 |
| N1 | M0  | T2bN1M0 | 2b | 3 | 80  | 240 |
| N0 | M0  | T1bN0M0 | 1a | 3 | 90  | 270 |
| N1 | M0  | T1N1M0  | 2a | 3 | 90  | 270 |
| N2 | M0  | T1bN2M0 | 3a | 3 | 90  | 270 |
| N0 | M0  | T1N0M0  | 1a | 3 | 100 | 300 |
| N0 | M0  | T2aN0M0 | 1b | 3 | 100 | 300 |
| N0 | M0  | T2bN0M0 | 2a | 3 | 100 | 300 |
| N0 | M0  | T2bN0M0 | 2a | 3 | 100 | 300 |
| N0 | M0  | T4N0M1b | 4  | 3 | 100 | 300 |
| N1 | M0  | T1aN1M0 | 2a | 3 | 100 | 300 |
| N1 | M0  | T1N1M0  | 2a | 3 | 100 | 300 |

|    |    |         |    |   |     |     |
|----|----|---------|----|---|-----|-----|
| N1 | M0 | T1bN1M0 | 2a | 3 | 100 | 300 |
| N1 | M0 | T2aN1M0 | 2a | 3 | 100 | 300 |
| N2 | M0 | T1N2M0  | 3a | 3 | 100 | 300 |
| N2 | M0 | T2bN2M0 | 3a | 3 | 100 | 300 |

Table S2. Primers used for Q-PCR.

| <b>Name</b>                   | <b>Forward primer</b>     | <b>Reverse primer</b>     |
|-------------------------------|---------------------------|---------------------------|
| <b>ABHD6</b>                  | GTGGACCTGGAGACTCTC        | TTCTCTTGGAGAAGATCAG       |
| <b>GAPDH</b>                  | 5'-GGTAGACAAGTTTCCCTT-3'  | 5'-ATATGTTCTGGATGATTCT-3' |
| <b>Acox1</b>                  | ACTGGCATTGAAGCATGTCTG     | TCAGGAACCTAGCCGTCTGG      |
| <b>Acadm</b>                  | TGTGGATAACCAACGGAGGA      | GAGCTTTAGGATCTGGATCAGAAC  |
| <b>Acadl</b>                  | CAAAACAGTTGCTCACCTACAGAC  | CACAAATGCTCGGGTTACACA     |
| <b>Acadvl</b>                 | CATACCCGTCCGTGCTCAA       | GGATCGTTCACTTCCTCGAAG     |
| <b>Cpt1b</b>                  | TGGCAGACGACGTGGAGTT       | CAGAACTTACCCCTGTCCCG      |
| <b>Pdhk4</b>                  | ATCTAACATCGCCAGAATTAACC   | GGAAGGTACACAATGTGGATTG    |
| <b>TGF-<math>\beta</math></b> | GCAACAATTCCTGGCGATAC      | CTAAGGCGAAAGCCCTCAA       |
| <b>FABP4</b>                  | CTTCCACGAGAGTTTATGAGAGAGC | CAGAATGTTGTAGAGTTCAATGCGA |
| <b>ADRP</b>                   | AGTGTGGTGACTCGGGTGGT      | AGGTAGGGATACTGGTCCTTTGT   |
| <b>E-Cad</b>                  | CCTCCTGAAAAGAGAGTGGG      | GTGTCCGGATTAATCTCCAG      |
| <b>VIM</b>                    | GAGAACTTTGCCGTTGAAGC      | TCCAGCAGCTTCCTGTAGGT      |
| <b>S100A4</b>                 | GTACTIONCGGGCAAAGAGGGTG   | TTGTCCCTGTTGCTGTCCAA      |
| <b>SNAIL</b>                  | GCCAAACTACAGCGAACTGG      | GAGAGAGGCCATTGGGTAGC      |

**Table S3. Levels of lipid metabolites in human cancer cell lines**  
**pmol/mg cell protein<sup>a</sup>**

| metabolite <sup>b</sup> | Sample      | pmol/mg cell protein <sup>a</sup> |         |         |         |         |          |          |          |
|-------------------------|-------------|-----------------------------------|---------|---------|---------|---------|----------|----------|----------|
|                         |             | LPE16:1                           | LPE16:0 | LPE18:2 | LPE18:1 | LPE18:0 | LPE18:0p | LPE18:1p | LPE20:0p |
| A549 shControl          | 1           | 0.0803                            | 0.4534  | 0.5583  | 0.3884  | 0.4896  | 0.6437   | 0.3123   | 0.0900   |
|                         | 2           | 0.0903                            | 1.3349  | 1.7757  | 0.8508  | 1.3042  | 0.4258   | 0.2572   | 0.1022   |
|                         | 3           | 0.0315                            | 1.1324  | 0.5827  | 0.4982  | 1.1153  | 0.4913   | 0.3523   | 0.0877   |
| A549 shABHD6            | 4           | 0.0547                            | 0.4935  | 0.6815  | 0.3586  | 0.6577  | 0.6351   | 0.3942   | 0.0823   |
|                         | 5           | 0.0649                            | 0.7964  | 0.8574  | 0.5725  | 1.0270  | 0.4648   | 0.2811   | 0.1187   |
|                         | 6           | 0.0335                            | 0.4318  | 0.5498  | 0.2498  | 0.5376  | 0.5902   | 0.3044   | 0.1084   |
| A549 shControl          | av          | 0.0674                            | 0.9736  | 0.9722  | 0.5791  | 0.9697  | 0.5203   | 0.3073   | 0.0933   |
|                         | sem         | 0.0315                            | 0.4617  | 0.6959  | 0.2416  | 0.4264  | 0.1118   | 0.0478   | 0.0078   |
| A549 shABHD6            | av          | 0.0511                            | 0.5739  | 0.6962  | 0.3936  | 0.7408  | 0.5634   | 0.3266   | 0.1031   |
|                         | sem         | 0.0160                            | 0.1952  | 0.1543  | 0.1642  | 0.2551  | 0.0882   | 0.0597   | 0.0188   |
|                         | p-value     | 0.4687                            | 0.2394  | 0.5392  | 0.3331  | 0.4695  | 0.6281   | 0.6842   | 0.4496   |
|                         | fold-change | 0.7580                            | 0.5895  | 0.7161  | 0.6797  | 0.7639  | 1.0828   | 1.0629   | 1.1052   |
| metabolite <sup>b</sup> |             | LPE16:1                           | LPE16:0 | LPE18:2 | LPE18:1 | LPE18:0 | LPE18:0p | LPE18:1p | LPE20:0p |
| SPC-A-1 shControl       | 1           | 0.0349                            | 0.2531  | 0.4901  | 0.2240  | 0.3170  | 0.4059   | 0.2071   | 0.0644   |
|                         | 2           | 0.0808                            | 0.3829  | 0.3589  | 0.1506  | 0.3348  | 0.6966   | 0.3308   | 0.0918   |
|                         | 3           | 0.0596                            | 0.2588  | 0.2362  | 0.0883  | 0.3053  | 0.6623   | 0.1988   | 0.0994   |
| SPC-A-1 shABHD6         | 4           | 0.0713                            | 0.3016  | 0.4060  | 0.2047  | 0.3826  | 0.6645   | 0.3559   | 0.0527   |
|                         | 5           | 0.0253                            | 0.2194  | 0.4148  | 0.2167  | 0.2912  | 0.4488   | 0.1968   | 0.0690   |
|                         | 6           | 0.0606                            | 0.3118  | 0.3620  | 0.1819  | 0.3904  | 0.5075   | 0.3887   | 0.0670   |
| SPC-A-1 shControl       | av          | 0.0584                            | 0.2983  | 0.3617  | 0.1543  | 0.3191  | 0.5883   | 0.2456   | 0.0852   |
|                         | sem         | 0.0230                            | 0.0734  | 0.1270  | 0.0679  | 0.0148  | 0.1589   | 0.0739   | 0.0184   |
| SPC-A-1 shABHD6         | av          | 0.0524                            | 0.2776  | 0.3943  | 0.2011  | 0.3547  | 0.5403   | 0.3138   | 0.0629   |
|                         | sem         | 0.0241                            | 0.0507  | 0.0283  | 0.0177  | 0.0552  | 0.1115   | 0.1026   | 0.0089   |
|                         | p-value     | 0.7694                            | 0.7087  | 0.6871  | 0.3119  | 0.3401  | 0.6906   | 0.4029   | 0.1310   |
|                         | fold-change | 0.8968                            | 0.9307  | 1.0900  | 1.3036  | 1.1119  | 0.9184   | 1.2779   | 0.7379   |

<sup>a</sup> all values are pmoles/mg cell protein.

<sup>b</sup> metabolite abbreviations are as follows: PC,phosphatidylcholines;PE,phosphatidylethanolamines;PS,phosphatidylserines;PA,phosphatidic acids;PG,ph

| PE34:2p | PE34:1p | PE36:4p | PE36:3p | PE36:2p | PE36:1p | PE38:6p | PE38:5p | PE38:4p | PE40:6p | PE40:5p |
|---------|---------|---------|---------|---------|---------|---------|---------|---------|---------|---------|
| 0.4822  | 0.2460  | 1.2608  | 0.5995  | 0.6907  | 0.1955  | 0.8910  | 1.7153  | 2.0329  | 1.4318  | 0.4773  |
| 0.2056  | 0.1254  | 0.5366  | 0.2479  | 0.3324  | 0.1606  | 0.7014  | 1.0578  | 0.9014  | 1.1338  | 0.4690  |
| 0.0427  | 0.0559  | 0.2318  | 0.1233  | 0.1398  | 0.0806  | 0.3058  | 0.3979  | 0.6873  | 0.6511  | 0.3617  |
| 0.4246  | 0.2069  | 0.8321  | 0.4931  | 0.5693  | 0.2442  | 0.6968  | 1.7234  | 1.8245  | 1.1043  | 0.5226  |
| 0.2195  | 0.1407  | 0.3707  | 0.2353  | 0.2997  | 0.1801  | 0.3786  | 0.6770  | 0.7309  | 0.6915  | 0.2932  |
| 0.4659  | 0.2079  | 0.8021  | 0.4425  | 0.6629  | 0.2893  | 0.7896  | 1.0945  | 1.4103  | 1.1476  | 0.5144  |
| 0.2435  | 0.1424  | 0.6764  | 0.3236  | 0.3876  | 0.1455  | 0.6328  | 1.0570  | 1.2072  | 1.0723  | 0.4360  |
| 0.2221  | 0.0962  | 0.5285  | 0.2469  | 0.2796  | 0.0589  | 0.2986  | 0.6587  | 0.7231  | 0.3940  | 0.0645  |
| 0.3700  | 0.1852  | 0.6683  | 0.3903  | 0.5106  | 0.2378  | 0.6217  | 1.1650  | 1.3219  | 0.9811  | 0.4434  |
| 0.1320  | 0.0385  | 0.2582  | 0.1366  | 0.1886  | 0.0549  | 0.2155  | 0.5267  | 0.5521  | 0.2518  | 0.1302  |
| 0.4442  | 0.5143  | 0.9821  | 0.7031  | 0.5617  | 0.1179  | 0.9609  | 0.8354  | 0.8378  | 0.7527  | 0.9341  |
| 1.5195  | 1.3002  | 0.9880  | 1.2062  | 1.3174  | 1.6343  | 0.9825  | 1.1022  | 1.0950  | 0.9150  | 1.0169  |
| PE34:2p | PE34:1p | PE36:4p | PE36:3p | PE36:2p | PE36:1p | PE38:6p | PE38:5p | PE38:4p | PE40:6p | PE40:5p |
| 0.5492  | 0.2261  | 0.9494  | 0.6330  | 0.9494  | 0.2872  | 0.6423  | 1.2500  | 1.9454  | 0.9707  | 0.5372  |
| 0.8346  | 0.3554  | 1.6225  | 0.8651  | 1.0858  | 0.2872  | 1.2276  | 2.1178  | 2.7568  | 1.4574  | 0.8489  |
| 0.6757  | 0.2632  | 1.4138  | 0.5251  | 1.1981  | 0.2836  | 0.8724  | 1.2157  | 1.9946  | 1.4654  | 0.5889  |
| 0.5929  | 0.3278  | 1.2767  | 0.7403  | 0.9693  | 0.3027  | 0.7764  | 1.6453  | 2.3840  | 1.3159  | 0.7105  |
| 0.5566  | 0.2533  | 1.1981  | 0.5093  | 0.7208  | 0.2407  | 0.6220  | 1.3191  | 1.5042  | 1.0102  | 0.4592  |
| 0.4793  | 0.2849  | 1.2390  | 0.5683  | 0.7048  | 0.2166  | 1.0416  | 1.5877  | 1.4304  | 1.4185  | 0.6009  |
| 0.6865  | 0.2815  | 1.3286  | 0.6744  | 1.0778  | 0.2860  | 0.9141  | 1.5278  | 2.2323  | 1.2978  | 0.6583  |
| 0.1430  | 0.0666  | 0.3445  | 0.1737  | 0.1245  | 0.0021  | 0.2949  | 0.5112  | 0.4549  | 0.2833  | 0.1671  |
| 0.5429  | 0.2886  | 1.2379  | 0.6060  | 0.7983  | 0.2534  | 0.8133  | 1.5174  | 1.7729  | 1.2482  | 0.5902  |
| 0.0580  | 0.0374  | 0.0393  | 0.1200  | 0.1483  | 0.0444  | 0.2122  | 0.1741  | 0.5306  | 0.2124  | 0.1260  |
| 0.1824  | 0.8799  | 0.6741  | 0.6046  | 0.0668  | 0.2724  | 0.6560  | 0.9748  | 0.3185  | 0.8202  | 0.6029  |
| 0.7908  | 1.0252  | 0.9318  | 0.8985  | 0.7407  | 0.8859  | 0.8897  | 0.9931  | 0.7942  | 0.9618  | 0.8965  |

osphatidylglycerols;PI,phosphatidylinositols;LBPA,lyso-bisphosphatidic acids;LPC,lyso-PC;LPE,lyso-PE;LPS,lyso-PS;LPA,lyso-PA;LPI,lyso-PI.



| PE40:4p | PE42:3p | PE42:2p | PE42:1p | PE42:0p | PE32:2 | PE32:1 | PE32:0 | PE34:2 | PE34:1 | PE34:0 |
|---------|---------|---------|---------|---------|--------|--------|--------|--------|--------|--------|
| 0.3926  | 0.1662  | 0.0749  | 0.0407  | 0.0293  | 0.0049 | 0.0358 | 0.0326 | 1.2282 | 0.4610 | 0.0880 |
| 0.2183  | 0.0986  | 0.0493  | 0.0254  | 0.0113  | 0.0042 | 0.0352 | 0.0211 | 1.1226 | 0.5761 | 0.0676 |
| 0.4373  | 0.1151  | 0.0575  | 0.0444  | 0.0247  | 0.0049 | 0.0691 | 0.0526 | 1.8283 | 1.0934 | 0.1233 |
| 0.3297  | 0.1555  | 0.0793  | 0.0233  | 0.0280  | 0.0140 | 0.0420 | 0.0296 | 1.3439 | 0.7653 | 0.1182 |
| 0.2274  | 0.0881  | 0.0657  | 0.0171  | 0.0263  | 0.0105 | 0.0552 | 0.0394 | 1.6367 | 0.7349 | 0.0789 |
| 0.3799  | 0.1407  | 0.0922  | 0.0235  | 0.0313  | 0.0047 | 0.0235 | 0.0188 | 0.9600 | 0.5550 | 0.0657 |
| 0.3494  | 0.1266  | 0.0606  | 0.0368  | 0.0218  | 0.0047 | 0.0467 | 0.0354 | 1.3930 | 0.7101 | 0.0930 |
| 0.1157  | 0.0352  | 0.0131  | 0.0101  | 0.0094  | 0.0004 | 0.0194 | 0.0159 | 0.3806 | 0.3368 | 0.0282 |
| 0.3124  | 0.1281  | 0.0791  | 0.0213  | 0.0285  | 0.0097 | 0.0402 | 0.0293 | 1.3135 | 0.6851 | 0.0876 |
| 0.0777  | 0.0355  | 0.0133  | 0.0036  | 0.0025  | 0.0047 | 0.0160 | 0.0103 | 0.3394 | 0.1136 | 0.0273 |
| 0.6692  | 0.9610  | 0.1604  | 0.0664  | 0.2936  | 0.1372 | 0.6777 | 0.6027 | 0.8005 | 0.9086 | 0.8242 |
| 0.8940  | 1.0118  | 1.3055  | 0.5782  | 1.3112  | 2.0795 | 0.8612 | 0.8254 | 0.9429 | 0.9647 | 0.9422 |
| PE40:4p | PE42:3p | PE42:2p | PE42:1p | PE42:0p | PE32:2 | PE32:1 | PE32:0 | PE34:2 | PE34:1 | PE34:0 |
| 0.2979  | 0.1090  | 0.0426  | 0.0226  | 0.0106  | 0.0066 | 0.0173 | 0.0093 | 0.4003 | 0.1941 | 0.0293 |
| 0.4182  | 0.2584  | 0.1615  | 0.0449  | 0.0503  | 0.0090 | 0.0251 | 0.0018 | 0.9781 | 0.3715 | 0.0772 |
| 0.3487  | 0.1900  | 0.0801  | 0.0217  | 0.0122  | 0.0095 | 0.0231 | 0.0217 | 0.7042 | 0.3066 | 0.0434 |
| 0.3090  | 0.1929  | 0.1019  | 0.0282  | 0.0314  | 0.0188 | 0.0267 | 0.0141 | 0.6823 | 0.2306 | 0.0471 |
| 0.2825  | 0.1364  | 0.0431  | 0.0167  | 0.0083  | 0.0111 | 0.0237 | 0.0056 | 0.5677 | 0.2477 | 0.0334 |
| 0.2270  | 0.1335  | 0.0712  | 0.0223  | 0.0163  | 0.0074 | 0.0089 | 0.0089 | 0.6128 | 0.2656 | 0.0490 |
| 0.3549  | 0.1858  | 0.0947  | 0.0297  | 0.0244  | 0.0084 | 0.0218 | 0.0109 | 0.6942 | 0.2908 | 0.0499 |
| 0.0604  | 0.0748  | 0.0608  | 0.0131  | 0.0224  | 0.0015 | 0.0041 | 0.0101 | 0.2891 | 0.0897 | 0.0246 |
| 0.2728  | 0.1543  | 0.0721  | 0.0224  | 0.0187  | 0.0125 | 0.0197 | 0.0095 | 0.6209 | 0.2479 | 0.0431 |
| 0.0418  | 0.0335  | 0.0294  | 0.0058  | 0.0117  | 0.0058 | 0.0095 | 0.0043 | 0.0577 | 0.0175 | 0.0085 |
| 0.1250  | 0.5415  | 0.5933  | 0.4256  | 0.7168  | 0.3045 | 0.7443 | 0.8344 | 0.6890 | 0.4628 | 0.6740 |
| 0.7687  | 0.8303  | 0.7613  | 0.7533  | 0.7666  | 1.4877 | 0.9044 | 0.8712 | 0.8945 | 0.8527 | 0.8636 |

| PE36:4 | PE36:3 | PE36:2 | PE36:1 | PE38:7 | PE38:6 | PE38:5 | PE38:4 | PE38:3 | PE40:6 | PE40:5 |
|--------|--------|--------|--------|--------|--------|--------|--------|--------|--------|--------|
| 0.5897 | 0.3975 | 1.2820 | 0.4024 | 0.1026 | 0.8454 | 0.4170 | 1.2608 | 0.2557 | 0.4936 | 0.1906 |
| 0.5704 | 0.4014 | 1.6691 | 0.5000 | 0.0901 | 0.9085 | 0.4282 | 1.0634 | 0.2521 | 0.9789 | 0.2254 |
| 0.8484 | 0.5278 | 1.7395 | 0.4275 | 0.0460 | 1.3465 | 0.5870 | 1.6129 | 0.2828 | 1.1131 | 0.3107 |
| 0.4744 | 0.3997 | 1.7949 | 0.5335 | 0.0700 | 0.5926 | 0.3951 | 1.3376 | 0.3329 | 0.4791 | 0.1384 |
| 0.5587 | 0.6139 | 1.4658 | 0.3602 | 0.0631 | 0.7283 | 0.3720 | 1.1200 | 0.2261 | 0.6441 | 0.2116 |
| 0.4190 | 0.3940 | 1.2493 | 0.3612 | 0.0672 | 0.6176 | 0.4112 | 0.9084 | 0.2251 | 0.6410 | 0.1861 |
| 0.6695 | 0.4422 | 1.5635 | 0.4433 | 0.0796 | 1.0335 | 0.4774 | 1.3124 | 0.2636 | 0.8619 | 0.2422 |
| 0.1552 | 0.0741 | 0.2463 | 0.0507 | 0.0297 | 0.2730 | 0.0951 | 0.2784 | 0.0168 | 0.3259 | 0.0618 |
| 0.4840 | 0.4692 | 1.5033 | 0.4183 | 0.0668 | 0.6462 | 0.3928 | 1.1220 | 0.2614 | 0.5881 | 0.1787 |
| 0.0703 | 0.1253 | 0.2748 | 0.0998 | 0.0035 | 0.0722 | 0.0197 | 0.2146 | 0.0619 | 0.0944 | 0.0372 |
| 0.1325 | 0.7641 | 0.7916 | 0.7187 | 0.4992 | 0.0763 | 0.2056 | 0.4014 | 0.9559 | 0.2348 | 0.2019 |
| 0.7230 | 1.0611 | 0.9615 | 0.9436 | 0.8389 | 0.6252 | 0.8228 | 0.8550 | 0.9917 | 0.6824 | 0.7378 |

| PE36:4 | PE36:3 | PE36:2 | PE36:1 | PE38:7 | PE38:6 | PE38:5 | PE38:4 | PE38:3 | PE40:6 | PE40:5 |
|--------|--------|--------|--------|--------|--------|--------|--------|--------|--------|--------|
| 0.3218 | 0.1862 | 0.6702 | 0.1662 | 0.0505 | 0.2527 | 0.1928 | 0.5917 | 0.1356 | 0.1449 | 0.0957 |
| 0.5133 | 0.3482 | 1.2994 | 0.3141 | 0.1561 | 0.8130 | 0.3679 | 0.8830 | 0.1723 | 0.4379 | 0.1418 |
| 0.4681 | 0.1886 | 0.8060 | 0.1913 | 0.1221 | 0.5305 | 0.1954 | 0.5862 | 0.0950 | 0.3256 | 0.1357 |
| 0.4909 | 0.3153 | 0.9740 | 0.2509 | 0.0957 | 0.5286 | 0.3058 | 0.9395 | 0.1647 | 0.2902 | 0.0925 |
| 0.3618 | 0.3117 | 1.0895 | 0.2908 | 0.0543 | 0.3075 | 0.1837 | 0.6262 | 0.1948 | 0.2741 | 0.1127 |
| 0.3294 | 0.2522 | 0.9941 | 0.2686 | 0.1068 | 0.5015 | 0.3472 | 0.7567 | 0.1232 | 0.2908 | 0.1053 |
| 0.4344 | 0.2410 | 0.9252 | 0.2239 | 0.1096 | 0.5321 | 0.2520 | 0.6870 | 0.1343 | 0.3028 | 0.1244 |
| 0.1001 | 0.0928 | 0.3311 | 0.0791 | 0.0539 | 0.2802 | 0.1004 | 0.1698 | 0.0387 | 0.1478 | 0.0250 |
| 0.3940 | 0.2931 | 1.0192 | 0.2701 | 0.0856 | 0.4459 | 0.2789 | 0.7741 | 0.1609 | 0.2850 | 0.1035 |
| 0.0855 | 0.0354 | 0.0617 | 0.0200 | 0.0277 | 0.1206 | 0.0850 | 0.1574 | 0.0360 | 0.0095 | 0.0102 |
| 0.6234 | 0.4153 | 0.6540 | 0.3820 | 0.5304 | 0.6501 | 0.7414 | 0.5500 | 0.4327 | 0.8453 | 0.2518 |
| 0.9071 | 1.2161 | 1.1016 | 1.2065 | 0.7810 | 0.8380 | 1.1066 | 1.1269 | 1.1979 | 0.9412 | 0.8322 |

| PE40:4 | LPA16:1 | LPA16:0 | LPA18:2 | LPA18:1 | LPA18:0 | PA32:2 | PA32:1 | PA32:0 | PA34:2 | PA34:1 |
|--------|---------|---------|---------|---------|---------|--------|--------|--------|--------|--------|
| 0.0896 | 0.0142  | 0.0911  | 0.2272  | 0.0496  | 0.0230  | 0.0226 | 0.0104 | 0.0094 | 0.1724 | 0.0273 |
| 0.0732 | 0.0096  | 0.0731  | 0.1412  | 0.0317  | 0.0158  | 0.0277 | 0.0138 | 0.0101 | 0.1644 | 0.0330 |
| 0.1151 | 0.0060  | 0.0443  | 0.0520  | 0.0230  | 0.0156  | 0.0199 | 0.0067 | 0.0078 | 0.1467 | 0.0307 |
| 0.0715 | 0.0182  | 0.1252  | 0.2383  | 0.0703  | 0.0216  | 0.0157 | 0.0085 | 0.0071 | 0.0941 | 0.0273 |
| 0.0605 | 0.0309  | 0.1397  | 0.2141  | 0.0735  | 0.0207  | 0.0202 | 0.0116 | 0.0091 | 0.1777 | 0.0332 |
| 0.0876 | 0.0127  | 0.1040  | 0.2470  | 0.0625  | 0.0212  | 0.0229 | 0.0116 | 0.0088 | 0.1569 | 0.0295 |
| 0.0926 | 0.0099  | 0.0695  | 0.1401  | 0.0348  | 0.0181  | 0.0234 | 0.0103 | 0.0091 | 0.1612 | 0.0303 |
| 0.0211 | 0.0041  | 0.0236  | 0.0876  | 0.0136  | 0.0042  | 0.0039 | 0.0036 | 0.0012 | 0.0131 | 0.0029 |
| 0.0732 | 0.0206  | 0.1230  | 0.2331  | 0.0688  | 0.0212  | 0.0196 | 0.0106 | 0.0083 | 0.1429 | 0.0300 |
| 0.0136 | 0.0093  | 0.0180  | 0.0170  | 0.0056  | 0.0005  | 0.0037 | 0.0018 | 0.0011 | 0.0435 | 0.0030 |
| 0.2508 | 0.1439  | 0.0355  | 0.1454  | 0.0160  | 0.2828  | 0.2892 | 0.9096 | 0.4271 | 0.5245 | 0.9009 |
| 0.7901 | 2.0738  | 1.7689  | 1.6638  | 1.9786  | 1.1663  | 0.8377 | 1.0271 | 0.9121 | 0.8867 | 0.9895 |

| PE40:4 | LPA16:1 | LPA16:0 | LPA18:2 | LPA18:1 | LPA18:0 | PA32:2 | PA32:1 | PA32:0 | PA34:2 | PA34:1 |
|--------|---------|---------|---------|---------|---------|--------|--------|--------|--------|--------|
| 0.0399 | 0.0036  | 0.0338  | 0.1288  | 0.0254  | 0.0120  | 0.0223 | 0.0113 | 0.0083 | 0.0646 | 0.0248 |
| 0.0969 | 0.0082  | 0.0767  | 0.2579  | 0.0537  | 0.0371  | 0.0401 | 0.0240 | 0.0153 | 0.0978 | 0.0300 |
| 0.0868 | 0.0087  | 0.0724  | 0.1588  | 0.0279  | 0.0267  | 0.0356 | 0.0147 | 0.0118 | 0.1404 | 0.0369 |
| 0.0674 | 0.0101  | 0.0731  | 0.2268  | 0.0419  | 0.0327  | 0.0553 | 0.0331 | 0.0274 | 0.1335 | 0.0456 |
| 0.0487 | 0.0022  | 0.0197  | 0.0547  | 0.0097  | 0.0061  | 0.0136 | 0.0065 | 0.0049 | 0.0481 | 0.0154 |
| 0.0430 | 0.0049  | 0.0312  | 0.0927  | 0.0176  | 0.0140  | 0.0164 | 0.0058 | 0.0065 | 0.1604 | 0.0207 |
| 0.0745 | 0.0069  | 0.0610  | 0.1818  | 0.0357  | 0.0253  | 0.0327 | 0.0167 | 0.0118 | 0.1009 | 0.0305 |
| 0.0304 | 0.0028  | 0.0236  | 0.0676  | 0.0156  | 0.0126  | 0.0092 | 0.0066 | 0.0035 | 0.0380 | 0.0061 |
| 0.0531 | 0.0057  | 0.0413  | 0.1247  | 0.0231  | 0.0176  | 0.0284 | 0.0151 | 0.0129 | 0.1140 | 0.0272 |
| 0.0128 | 0.0040  | 0.0281  | 0.0904  | 0.0168  | 0.0137  | 0.0233 | 0.0156 | 0.0126 | 0.0586 | 0.0161 |
| 0.3225 | 0.7062  | 0.4069  | 0.4304  | 0.3947  | 0.5135  | 0.7846 | 0.8804 | 0.8897 | 0.7616 | 0.7563 |
| 0.7117 | 0.8335  | 0.6780  | 0.6860  | 0.6464  | 0.6961  | 0.8704 | 0.9061 | 1.0940 | 1.1298 | 0.8918 |

| PA36:2 | PA36:1 | PA38:5 | PA38:4 | PA38:3 | PA40:6 | PA40:5 | LPI16:1 | LPI16:0 | LPI18:0 | LPI20:4 |
|--------|--------|--------|--------|--------|--------|--------|---------|---------|---------|---------|
| 0.0648 | 0.0212 | 0.0236 | 0.0557 | 0.0185 | 0.0182 | 0.0069 | 0.0301  | 0.4095  | 1.2941  | 0.5475  |
| 0.0609 | 0.0144 | 0.0212 | 0.0497 | 0.0123 | 0.0209 | 0.0110 | 0.0169  | 0.1587  | 0.7531  | 0.5348  |
| 0.0568 | 0.0186 | 0.0195 | 0.0599 | 0.0126 | 0.0179 | 0.0086 | 0.0259  | 0.3572  | 1.6578  | 0.5076  |
| 0.0535 | 0.0147 | 0.0111 | 0.0530 | 0.0149 | 0.0115 | 0.0077 | 0.0151  | 0.3032  | 1.5927  | 0.7719  |
| 0.0715 | 0.0214 | 0.0198 | 0.0494 | 0.0113 | 0.0193 | 0.0126 | 0.0314  | 0.3336  | 1.3588  | 0.6223  |
| 0.0585 | 0.0188 | 0.0187 | 0.0516 | 0.0171 | 0.0239 | 0.0098 | 0.0264  | 0.4597  | 2.2180  | 1.0021  |
| 0.0608 | 0.0181 | 0.0214 | 0.0551 | 0.0145 | 0.0190 | 0.0088 | 0.0243  | 0.3085  | 1.2350  | 0.5300  |
| 0.0040 | 0.0034 | 0.0021 | 0.0052 | 0.0035 | 0.0017 | 0.0021 | 0.0067  | 0.1323  | 0.4552  | 0.0204  |
| 0.0612 | 0.0183 | 0.0165 | 0.0513 | 0.0145 | 0.0183 | 0.0100 | 0.0243  | 0.3655  | 1.7232  | 0.7988  |
| 0.0093 | 0.0034 | 0.0047 | 0.0018 | 0.0030 | 0.0063 | 0.0024 | 0.0084  | 0.0829  | 0.4443  | 0.1914  |
| 0.9547 | 0.9385 | 0.1752 | 0.2933 | 0.9922 | 0.8522 | 0.5551 | 0.9969  | 0.5613  | 0.2545  | 0.0728  |
| 1.0058 | 1.0127 | 0.7717 | 0.9308 | 0.9981 | 0.9609 | 1.1341 | 0.9990  | 1.1849  | 1.3953  | 1.5072  |

| PA36:2 | PA36:1 | PA38:5 | PA38:4 | PA38:3 | PA40:6 | PA40:5 | LPI16:1 | LPI16:0 | LPI18:0 | LPI20:4 |
|--------|--------|--------|--------|--------|--------|--------|---------|---------|---------|---------|
| 0.0607 | 0.0120 | 0.0193 | 0.0528 | 0.0145 | 0.0092 | 0.0050 | 0.0046  | 0.1029  | 0.4717  | 0.3390  |
| 0.0859 | 0.0227 | 0.0264 | 0.1075 | 0.0278 | 0.0274 | 0.0117 | 0.0296  | 0.6366  | 3.2757  | 1.7295  |
| 0.0992 | 0.0252 | 0.0359 | 0.1534 | 0.0247 | 0.0366 | 0.0145 | 0.0147  | 0.2437  | 1.3807  | 0.7073  |
| 0.1045 | 0.0293 | 0.0456 | 0.1933 | 0.0451 | 0.0339 | 0.0149 | 0.0367  | 0.5523  | 3.6244  | 1.9380  |
| 0.0348 | 0.0095 | 0.0079 | 0.0229 | 0.0084 | 0.0099 | 0.0043 | 0.0108  | 0.0912  | 0.4815  | 0.2611  |
| 0.0549 | 0.0103 | 0.0158 | 0.0606 | 0.0100 | 0.0180 | 0.0090 | 0.0052  | 0.1150  | 0.8687  | 0.3707  |
| 0.0819 | 0.0200 | 0.0272 | 0.1046 | 0.0223 | 0.0244 | 0.0104 | 0.0163  | 0.3277  | 1.7094  | 0.9252  |
| 0.0196 | 0.0070 | 0.0083 | 0.0504 | 0.0070 | 0.0140 | 0.0049 | 0.0126  | 0.2766  | 1.4306  | 0.7204  |
| 0.0647 | 0.0164 | 0.0231 | 0.0922 | 0.0211 | 0.0206 | 0.0094 | 0.0176  | 0.2528  | 1.6582  | 0.8566  |
| 0.0359 | 0.0112 | 0.0199 | 0.0895 | 0.0207 | 0.0122 | 0.0053 | 0.0168  | 0.2596  | 1.7137  | 0.9381  |
| 0.5066 | 0.6619 | 0.7574 | 0.8453 | 0.9290 | 0.7399 | 0.8212 | 0.9195  | 0.7495  | 0.9702  | 0.9247  |
| 0.7902 | 0.8200 | 0.8486 | 0.8820 | 0.9464 | 0.8438 | 0.9037 | 1.0801  | 0.7714  | 0.9701  | 0.9258  |

| PI 34:2 | PI 34:1 | PI 36:4 | PI 36:3 | PI 36:2 | PI 36:1 | PI 38:6 | PI 38:5 | PI 38:4 | PI 38:3 | PI 40:6 |
|---------|---------|---------|---------|---------|---------|---------|---------|---------|---------|---------|
| 1.5835  | 0.8165  | 0.5416  | 0.4328  | 2.2926  | 0.5692  | 0.0951  | 0.1591  | 1.6977  | 0.3389  | 0.0765  |
| 0.7403  | 0.8392  | 0.3719  | 0.2909  | 1.4811  | 0.5196  | 0.0605  | 0.1292  | 3.1923  | 0.7783  | 0.1679  |
| 0.7215  | 0.4175  | 0.1662  | 0.1130  | 1.4769  | 0.3003  | 0.0239  | 0.0360  | 0.7531  | 0.0985  | 0.0361  |
| 0.7712  | 0.7699  | 0.5104  | 0.4675  | 2.7225  | 0.9563  | 0.0222  | 0.1177  | 2.7278  | 0.7629  | 0.0814  |
| 0.8106  | 0.6314  | 0.5297  | 0.3405  | 1.7283  | 0.5030  | 0.0326  | 0.1234  | 1.8884  | 0.5139  | 0.0915  |
| 1.0481  | 0.6877  | 0.3711  | 0.2495  | 1.7113  | 0.4729  | 0.0472  | 0.0937  | 2.2630  | 0.4682  | 0.1059  |
| 1.0151  | 0.6911  | 0.3599  | 0.2789  | 1.7502  | 0.4630  | 0.0598  | 0.1081  | 1.8810  | 0.4052  | 0.0935  |
| 0.4924  | 0.2372  | 0.1880  | 0.1602  | 0.4697  | 0.1431  | 0.0356  | 0.0642  | 1.2299  | 0.3447  | 0.0675  |
| 0.8766  | 0.6963  | 0.4704  | 0.3525  | 2.0541  | 0.6440  | 0.0340  | 0.1116  | 2.2931  | 0.5817  | 0.0929  |
| 0.1498  | 0.0697  | 0.0865  | 0.1095  | 0.5790  | 0.2708  | 0.0126  | 0.0157  | 0.4205  | 0.1586  | 0.0123  |
| 0.6655  | 0.9723  | 0.4073  | 0.5470  | 0.5192  | 0.3639  | 0.3021  | 0.9321  | 0.6121  | 0.4658  | 0.9894  |
| 0.8636  | 1.0076  | 1.3070  | 1.2640  | 1.1736  | 1.3909  | 0.5685  | 1.0321  | 1.2191  | 1.4354  | 0.9940  |

| PI 34:2 | PI 34:1 | PI 36:4 | PI 36:3 | PI 36:2 | PI 36:1 | PI 38:6 | PI 38:5 | PI 38:4 | PI 38:3 | PI 40:6 |
|---------|---------|---------|---------|---------|---------|---------|---------|---------|---------|---------|
| 0.4367  | 0.3164  | 0.1568  | 0.2089  | 1.0445  | 0.2690  | 0.0166  | 0.0543  | 1.2184  | 0.2847  | 0.0402  |
| 0.7887  | 0.5906  | 0.2379  | 0.2180  | 1.5811  | 0.4691  | 0.0398  | 0.0800  | 1.4371  | 0.3718  | 0.0930  |
| 0.3759  | 0.2823  | 0.1573  | 0.0954  | 1.4572  | 0.3584  | 0.0201  | 0.0625  | 1.5307  | 0.2691  | 0.0912  |
| 0.3578  | 0.3068  | 0.2095  | 0.2694  | 1.3275  | 0.3215  | 0.0337  | 0.0754  | 1.6607  | 0.4896  | 0.0501  |
| 0.3761  | 0.2668  | 0.1300  | 0.1250  | 0.6476  | 0.2460  | 0.0090  | 0.0326  | 0.7816  | 0.2211  | 0.0236  |
| 0.1898  | 0.1442  | 0.0955  | 0.1280  | 0.7639  | 0.2397  | 0.0152  | 0.0398  | 1.0985  | 0.1982  | 0.0500  |
| 0.5338  | 0.3964  | 0.1840  | 0.1741  | 1.3609  | 0.3655  | 0.0255  | 0.0656  | 1.3954  | 0.3085  | 0.0748  |
| 0.2228  | 0.1690  | 0.0467  | 0.0683  | 0.2810  | 0.1002  | 0.0125  | 0.0131  | 0.1602  | 0.0553  | 0.0300  |
| 0.3079  | 0.2393  | 0.1450  | 0.1741  | 0.9130  | 0.2691  | 0.0193  | 0.0493  | 1.1803  | 0.3030  | 0.0412  |
| 0.1026  | 0.0847  | 0.0585  | 0.0825  | 0.3637  | 0.0455  | 0.0128  | 0.0229  | 0.4452  | 0.1620  | 0.0153  |
| 0.1860  | 0.2234  | 0.4175  | 1.0000  | 0.1667  | 0.2038  | 0.5816  | 0.3442  | 0.4751  | 0.9577  | 0.1590  |
| 0.5768  | 0.6036  | 0.7880  | 1.0000  | 0.6709  | 0.7362  | 0.7567  | 0.7512  | 0.8458  | 0.9819  | 0.5515  |

| PI 40:5 | PI 40:4 | LPS16:0 | LPS18:1 | LPS18:0 | PS 34:2 | PS 34:1 | PS 36:2 | PS 36:1 | PS 38:5 | PS 38:4 |
|---------|---------|---------|---------|---------|---------|---------|---------|---------|---------|---------|
| 0.0554  | 0.0243  | 0.0022  | 0.0120  | 0.0224  | 0.0023  | 0.0035  | 0.0236  | 0.1703  | 0.0041  | 0.0937  |
| 0.0937  | 0.0340  | 0.0020  | 0.0080  | 0.0136  | 0.0028  | 0.0051  | 0.0491  | 0.2150  | 0.0089  | 0.1371  |
| 0.0267  | 0.0108  | 0.0026  | 0.0483  | 0.0936  | 0.0028  | 0.0164  | 0.1012  | 0.6697  | 0.0120  | 0.2925  |
| 0.0723  | 0.0381  | 0.0014  | 0.0141  | 0.0230  | 0.0021  | 0.0031  | 0.0236  | 0.1673  | 0.0073  | 0.1294  |
| 0.0602  | 0.0488  | 0.0024  | 0.0140  | 0.0171  | 0.0026  | 0.0056  | 0.0292  | 0.1820  | 0.0074  | 0.0902  |
| 0.0529  | 0.0264  | 0.0030  | 0.0214  | 0.0311  | 0.0032  | 0.0036  | 0.0212  | 0.1679  | 0.0077  | 0.0867  |
| 0.0586  | 0.0230  | 0.0023  | 0.0228  | 0.0432  | 0.0026  | 0.0083  | 0.0580  | 0.3517  | 0.0083  | 0.1744  |
| 0.0336  | 0.0117  | 0.0003  | 0.0222  | 0.0439  | 0.0003  | 0.0070  | 0.0395  | 0.2763  | 0.0040  | 0.1046  |
| 0.0618  | 0.0378  | 0.0023  | 0.0165  | 0.0237  | 0.0026  | 0.0041  | 0.0247  | 0.1724  | 0.0074  | 0.1021  |
| 0.0098  | 0.0112  | 0.0008  | 0.0042  | 0.0070  | 0.0005  | 0.0014  | 0.0041  | 0.0083  | 0.0002  | 0.0237  |
| 0.8823  | 0.1897  | 0.9948  | 0.6556  | 0.4897  | 0.9487  | 0.3636  | 0.2198  | 0.3242  | 0.7199  | 0.3075  |
| 1.0545  | 1.6412  | 1.0015  | 0.7244  | 0.5490  | 0.9908  | 0.4926  | 0.4252  | 0.4902  | 0.8931  | 0.5854  |

| PI 40:5 | PI 40:4 | LPS16:0 | LPS18:1 | LPS18:0 | PS 34:2 | PS 34:1 | PS 36:2 | PS 36:1 | PS 38:5 | PS 38:4 |
|---------|---------|---------|---------|---------|---------|---------|---------|---------|---------|---------|
| 0.0273  | 0.0164  | 0.0025  | 0.0041  | 0.0071  | 0.0013  | 0.0023  | 0.0229  | 0.1429  | 0.0039  | 0.0583  |
| 0.0706  | 0.0206  | 0.0031  | 0.0161  | 0.0302  | 0.0040  | 0.0025  | 0.0256  | 0.1451  | 0.0048  | 0.0910  |
| 0.0456  | 0.0170  | 0.0019  | 0.0078  | 0.0141  | 0.0021  | 0.0025  | 0.0232  | 0.1622  | 0.0048  | 0.0983  |
| 0.0430  | 0.0218  | 0.0016  | 0.0162  | 0.0405  | 0.0015  | 0.0042  | 0.0264  | 0.1799  | 0.0075  | 0.1111  |
| 0.0258  | 0.0159  | 0.0020  | 0.0060  | 0.0137  | 0.0022  | 0.0024  | 0.0238  | 0.2011  | 0.0056  | 0.1409  |
| 0.0343  | 0.0218  | 0.0015  | 0.0089  | 0.0091  | 0.0016  | 0.0014  | 0.0173  | 0.1200  | 0.0026  | 0.0372  |
| 0.0479  | 0.0180  | 0.0025  | 0.0094  | 0.0172  | 0.0025  | 0.0024  | 0.0239  | 0.1501  | 0.0045  | 0.0825  |
| 0.0217  | 0.0023  | 0.0006  | 0.0062  | 0.0118  | 0.0013  | 0.0001  | 0.0015  | 0.0106  | 0.0005  | 0.0213  |
| 0.0344  | 0.0198  | 0.0017  | 0.0104  | 0.0211  | 0.0018  | 0.0026  | 0.0225  | 0.1670  | 0.0052  | 0.0964  |
| 0.0086  | 0.0034  | 0.0003  | 0.0053  | 0.0170  | 0.0004  | 0.0014  | 0.0047  | 0.0421  | 0.0024  | 0.0534  |
| 0.3748  | 0.4785  | 0.1241  | 0.8376  | 0.7581  | 0.4423  | 0.8023  | 0.6487  | 0.5360  | 0.6389  | 0.6974  |
| 0.7186  | 1.1024  | 0.6901  | 1.1094  | 1.2295  | 0.7229  | 1.0895  | 0.9414  | 1.1128  | 1.1619  | 1.1681  |

| PS 38:3 | PS 40:7 | PS 40:6 | PS 40:5 | PS 40:4 | PG34:2 | PG34:1 | PG36:3 | PG36:2 | PG36:1 | PG38:5 |
|---------|---------|---------|---------|---------|--------|--------|--------|--------|--------|--------|
| 0.0258  | 0.0499  | 0.0421  | 0.0206  | 0.0245  | 0.0388 | 0.0649 | 0.0172 | 0.0593 | 0.0447 | 0.0047 |
| 0.0401  | 0.0684  | 0.0546  | 0.0338  | 0.0235  | 0.0206 | 0.0865 | 0.0137 | 0.0773 | 0.0928 | 0.0047 |
| 0.0745  | 0.0559  | 0.0937  | 0.0707  | 0.0590  | 0.0250 | 0.0906 | 0.0135 | 0.0668 | 0.0521 | 0.0071 |
| 0.0328  | 0.0652  | 0.0404  | 0.0319  | 0.0292  | 0.0270 | 0.0925 | 0.0160 | 0.1066 | 0.1349 | 0.0072 |
| 0.0314  | 0.0938  | 0.0301  | 0.0207  | 0.0165  | 0.0266 | 0.0844 | 0.0114 | 0.0852 | 0.0736 | 0.0056 |
| 0.0260  | 0.0723  | 0.0468  | 0.0195  | 0.0152  | 0.0221 | 0.0676 | 0.0116 | 0.0554 | 0.0604 | 0.0090 |
| 0.0468  | 0.0581  | 0.0635  | 0.0417  | 0.0357  | 0.0281 | 0.0807 | 0.0148 | 0.0678 | 0.0632 | 0.0055 |
| 0.0250  | 0.0095  | 0.0269  | 0.0260  | 0.0202  | 0.0095 | 0.0138 | 0.0021 | 0.0091 | 0.0259 | 0.0014 |
| 0.0301  | 0.0771  | 0.0391  | 0.0240  | 0.0203  | 0.0252 | 0.0815 | 0.0130 | 0.0824 | 0.0896 | 0.0073 |
| 0.0036  | 0.0149  | 0.0084  | 0.0068  | 0.0077  | 0.0028 | 0.0127 | 0.0026 | 0.0257 | 0.0398 | 0.0017 |
| 0.3146  | 0.1354  | 0.2087  | 0.3187  | 0.2853  | 0.6387 | 0.9444 | 0.4044 | 0.4059 | 0.3894 | 0.2376 |
| 0.6421  | 1.3268  | 0.6162  | 0.5767  | 0.5682  | 0.8970 | 1.0099 | 0.8790 | 1.2154 | 1.4182 | 1.3196 |

| PS 38:3 | PS 40:7 | PS 40:6 | PS 40:5 | PS 40:4 | PG34:2 | PG34:1 | PG36:3 | PG36:2 | PG36:1 | PG38:5 |
|---------|---------|---------|---------|---------|--------|--------|--------|--------|--------|--------|
| 0.0188  | 0.0228  | 0.0209  | 0.0118  | 0.0137  | 0.0075 | 0.0253 | 0.0078 | 0.0151 | 0.0191 | 0.0081 |
| 0.0236  | 0.0311  | 0.0367  | 0.0206  | 0.0163  | 0.0237 | 0.0793 | 0.0142 | 0.0540 | 0.0458 | 0.0076 |
| 0.0229  | 0.0311  | 0.0380  | 0.0208  | 0.0180  | 0.0099 | 0.0296 | 0.0059 | 0.0264 | 0.0197 | 0.0044 |
| 0.0298  | 0.0470  | 0.0385  | 0.0248  | 0.0240  | 0.0114 | 0.0350 | 0.0099 | 0.0365 | 0.0242 | 0.0076 |
| 0.0365  | 0.0219  | 0.0306  | 0.0218  | 0.0285  | 0.0177 | 0.0247 | 0.0083 | 0.0363 | 0.0390 | 0.0027 |
| 0.0106  | 0.0255  | 0.0220  | 0.0116  | 0.0071  | 0.0112 | 0.0298 | 0.0056 | 0.0397 | 0.0259 | 0.0028 |
| 0.0218  | 0.0284  | 0.0319  | 0.0177  | 0.0160  | 0.0137 | 0.0447 | 0.0093 | 0.0318 | 0.0282 | 0.0067 |
| 0.0026  | 0.0048  | 0.0095  | 0.0051  | 0.0022  | 0.0087 | 0.0300 | 0.0043 | 0.0200 | 0.0152 | 0.0020 |
| 0.0257  | 0.0315  | 0.0304  | 0.0194  | 0.0199  | 0.0134 | 0.0298 | 0.0079 | 0.0375 | 0.0297 | 0.0044 |
| 0.0134  | 0.0136  | 0.0082  | 0.0069  | 0.0113  | 0.0037 | 0.0051 | 0.0022 | 0.0019 | 0.0081 | 0.0028 |
| 0.6500  | 0.7253  | 0.8488  | 0.7499  | 0.5917  | 0.9573 | 0.4441 | 0.6520 | 0.6523 | 0.8868 | 0.2982 |
| 1.1777  | 1.1105  | 0.9537  | 1.0957  | 1.2407  | 0.9773 | 0.6669 | 0.8536 | 1.1771 | 1.0536 | 0.6479 |

| PG38:4 | LysoPC14:0e | LysoPC16:1 | LysoPC16:0 | LysoPC18:3 | LysoPC18:2 | LysoPC18:1 | LysoPC18:0 | LysoPC20:5 | LysoPC20:4 | LysoPC20:3 |
|--------|-------------|------------|------------|------------|------------|------------|------------|------------|------------|------------|
| 0.0078 | 0.2496      | 0.9049     | 37.4665    | 0.4343     | 18.8597    | 10.5040    | 18.9115    | 0.8859     | 9.6348     | 2.6269     |
| 0.0056 | 0.2033      | 0.7008     | 30.0467    | 0.3131     | 19.1515    | 10.6051    | 10.6698    | 1.0874     | 7.9385     | 2.6834     |
| 0.0091 | 0.1077      | 0.6902     | 30.3604    | 0.2838     | 17.7544    | 11.1521    | 9.4512     | 0.4390     | 7.1129     | 1.2687     |
| 0.0121 | 0.1704      | 0.8972     | 45.3364    | 0.4645     | 26.1568    | 16.2260    | 22.5729    | 0.4835     | 10.3301    | 3.4212     |
| 0.0067 | 0.2071      | 1.1717     | 33.2942    | 0.3555     | 22.1395    | 17.9886    | 12.3890    | 0.4029     | 7.3801     | 2.4909     |
| 0.0125 | 0.2108      | 0.9417     | 51.5760    | 0.3888     | 29.1687    | 16.0241    | 20.0870    | 0.7109     | 11.1338    | 2.9783     |
| 0.0075 | 0.1869      | 0.7653     | 32.6245    | 0.3437     | 18.5885    | 10.7537    | 13.0108    | 0.8041     | 8.2287     | 2.1930     |
| 0.0017 | 0.0724      | 0.1210     | 4.1962     | 0.0798     | 0.7369     | 0.3487     | 5.1463     | 0.3319     | 1.2858     | 0.8010     |
| 0.0104 | 0.1961      | 1.0035     | 43.4022    | 0.4029     | 25.8217    | 16.7462    | 18.3497    | 0.5324     | 9.6147     | 2.9635     |
| 0.0033 | 0.0223      | 0.1473     | 9.2931     | 0.0559     | 3.5265     | 1.0806     | 5.3096     | 0.1597     | 1.9764     | 0.4653     |
| 0.2408 | 0.8430      | 0.0964     | 0.1411     | 0.3520     | 0.0254     | 0.0008     | 0.2793     | 0.2705     | 0.3662     | 0.2231     |
| 1.3929 | 1.0495      | 1.3113     | 1.3304     | 1.1722     | 1.3891     | 1.5573     | 1.4103     | 0.6621     | 1.1684     | 1.3513     |

| PG38:4 | LysoPC14:0e | LysoPC16:1 | LysoPC16:0 | LysoPC18:3 | LysoPC18:2 | LysoPC18:1 | LysoPC18:0 | LysoPC20:5 | LysoPC20:4 | LysoPC20:3 |
|--------|-------------|------------|------------|------------|------------|------------|------------|------------|------------|------------|
| 0.0030 | 0.1579      | 0.5453     | 27.3323    | 0.1580     | 21.9575    | 9.3428     | 11.1916    | 0.1545     | 9.1268     | 2.2489     |
| 0.0076 | 0.2102      | 0.5523     | 30.4651    | 0.1647     | 23.3695    | 9.0435     | 12.8349    | 0.7166     | 11.0416    | 1.9713     |
| 0.0059 | 0.1913      | 0.5251     | 31.6568    | 0.1649     | 18.3199    | 7.4862     | 10.9649    | 0.5484     | 11.0553    | 1.5660     |
| 0.0058 | 0.1958      | 0.8452     | 34.6604    | 0.2387     | 22.4444    | 10.2035    | 13.2419    | 0.4773     | 13.8972    | 2.8722     |
| 0.0051 | 0.1399      | 0.5362     | 29.4745    | 0.2416     | 21.6607    | 8.3312     | 11.3945    | 0.2858     | 9.1317     | 2.7455     |
| 0.0034 | 0.1573      | 0.4636     | 26.1868    | 0.1465     | 16.2932    | 7.0977     | 11.0986    | 0.5964     | 6.2313     | 1.1349     |
| 0.0055 | 0.1865      | 0.5409     | 29.8181    | 0.1626     | 21.2156    | 8.6242     | 11.6638    | 0.4732     | 10.4079    | 1.9287     |
| 0.0024 | 0.0264      | 0.0141     | 2.2337     | 0.0039     | 2.6052     | 0.9968     | 1.0205     | 0.2885     | 1.1095     | 0.3434     |
| 0.0048 | 0.1643      | 0.6150     | 30.1072    | 0.2089     | 20.1327    | 8.5441     | 11.9116    | 0.4532     | 9.7534     | 2.2509     |
| 0.0012 | 0.0286      | 0.2026     | 4.2721     | 0.0541     | 3.3482     | 1.5638     | 1.1615     | 0.1567     | 3.8706     | 0.9685     |
| 0.6657 | 0.3808      | 0.5618     | 0.9223     | 0.2126     | 0.6813     | 0.9440     | 0.7950     | 0.9212     | 0.7923     | 0.6160     |
| 0.8699 | 0.8813      | 1.1370     | 1.0097     | 1.2854     | 0.9490     | 0.9907     | 1.0212     | 0.9578     | 0.9371     | 1.1670     |



| LysoPC22:6 | LysoPC22:5 | PC32:2e | PC32:1e | PC34:2p | PC34:1p | PC34:0p | PC36:4p | PC36:3p | PC36:2p | PC36:1p |
|------------|------------|---------|---------|---------|---------|---------|---------|---------|---------|---------|
| 2.7598     | 0.8435     | 0.4947  | 1.4505  | 0.5266  | 4.0085  | 3.7170  | 1.4442  | 10.0300 | 3.5770  | 4.4750  |
| 4.5258     | 1.2140     | 0.5655  | 1.2654  | 0.3104  | 3.2912  | 4.2161  | 0.8547  | 5.2601  | 2.8060  | 6.1084  |
| 2.6734     | 0.7287     | 0.4839  | 1.1371  | 0.3739  | 1.9219  | 4.2762  | 0.5113  | 2.9919  | 2.0823  | 3.6949  |
| 2.3940     | 1.0139     | 0.6114  | 1.6898  | 0.5506  | 3.2471  | 3.8554  | 0.9354  | 7.1143  | 3.0199  | 4.0165  |
| 2.3593     | 0.8744     | 0.6087  | 1.8050  | 0.3842  | 3.4365  | 6.5886  | 0.4978  | 4.0619  | 3.2164  | 5.9158  |
| 4.3405     | 1.2273     | 0.5780  | 1.4557  | 0.6365  | 3.5673  | 4.4029  | 1.0402  | 5.5100  | 2.8945  | 5.0019  |
| 3.3196     | 0.9287     | 0.5147  | 1.2844  | 0.4036  | 3.0739  | 4.0698  | 0.9368  | 6.0940  | 2.8218  | 4.7594  |
| 1.0454     | 0.2536     | 0.0443  | 0.1575  | 0.1111  | 1.0601  | 0.3070  | 0.4718  | 3.5924  | 0.7474  | 1.2316  |
| 3.0313     | 1.0386     | 0.5994  | 1.6502  | 0.5237  | 3.4170  | 4.9490  | 0.8245  | 5.5621  | 3.0436  | 4.9781  |
| 1.1340     | 0.1777     | 0.0186  | 0.1780  | 0.1282  | 0.1610  | 1.4461  | 0.2877  | 1.5269  | 0.1623  | 0.9499  |
| 0.7623     | 0.5722     | 0.0380  | 0.0561  | 0.2874  | 0.6090  | 0.3612  | 0.7426  | 0.8250  | 0.6418  | 0.8196  |
| 0.9131     | 1.1183     | 1.1644  | 1.2848  | 1.2976  | 1.1116  | 1.2160  | 0.8801  | 0.9127  | 1.0786  | 1.0459  |
| LysoPC22:6 | LysoPC22:5 | PC32:2e | PC32:1e | PC34:2p | PC34:1p | PC34:0p | PC36:4p | PC36:3p | PC36:2p | PC36:1p |
| 1.7840     | 0.8430     | 0.3459  | 1.1062  | 0.2499  | 4.5469  | 2.8521  | 0.3230  | 5.3559  | 2.7172  | 4.0279  |
| 3.4196     | 1.1250     | 0.8269  | 1.5967  | 1.0416  | 5.4217  | 4.2611  | 2.6000  | 9.6020  | 3.9183  | 7.1327  |
| 3.8966     | 0.9764     | 0.7698  | 1.4234  | 0.7398  | 3.4721  | 3.5180  | 1.4477  | 7.6487  | 2.7665  | 5.1767  |
| 3.0720     | 1.2706     | 0.7720  | 1.7130  | 0.9774  | 4.5898  | 4.5359  | 1.8392  | 10.7085 | 3.9550  | 5.8489  |
| 1.9224     | 0.7596     | 0.2208  | 0.7698  | 0.2137  | 2.2019  | 1.7828  | 0.4033  | 4.4536  | 1.8271  | 2.3525  |
| 2.9265     | 0.6336     | 0.5199  | 0.9571  | 0.4412  | 3.0762  | 2.4120  | 1.0290  | 5.7373  | 2.7266  | 4.4625  |
| 3.0334     | 0.9815     | 0.6475  | 1.3754  | 0.6771  | 4.4802  | 3.5437  | 1.4569  | 7.5355  | 3.1340  | 5.4458  |
| 1.1080     | 0.1411     | 0.2628  | 0.2487  | 0.3996  | 0.9765  | 0.7048  | 1.1385  | 2.1253  | 0.6797  | 1.5698  |
| 2.6403     | 0.8879     | 0.5042  | 1.1467  | 0.5441  | 3.2893  | 2.9102  | 1.0905  | 6.9665  | 2.8363  | 4.2213  |
| 0.6260     | 0.3374     | 0.2759  | 0.4993  | 0.3921  | 1.2081  | 1.4426  | 0.7199  | 3.3036  | 1.0682  | 1.7606  |
| 0.6210     | 0.6806     | 0.5503  | 0.5168  | 0.7019  | 0.2549  | 0.5319  | 0.6621  | 0.8142  | 0.7046  | 0.4194  |
| 0.8704     | 0.9047     | 0.7787  | 0.8337  | 0.8036  | 0.7342  | 0.8212  | 0.7485  | 0.9245  | 0.9050  | 0.7751  |

| PC36:0p | PC38:4p | PC38:3p | PC38:2p | PC38:1p | PC40:6p | PC40:5p | PC40:4p | PC40:3p | PC40:2p | PC40:1p |
|---------|---------|---------|---------|---------|---------|---------|---------|---------|---------|---------|
| 2.4348  | 8.8061  | 7.0600  | 2.9851  | 1.2826  | 3.3248  | 2.8137  | 3.0037  | 2.2626  | 1.4560  | 0.5821  |
| 2.9855  | 6.9117  | 4.8716  | 1.8936  | 0.8914  | 3.7521  | 3.3559  | 1.9688  | 1.0963  | 0.5260  | 0.2860  |
| 2.6555  | 4.8977  | 3.1349  | 2.4439  | 1.1611  | 2.1460  | 1.5861  | 3.0989  | 1.5971  | 1.3512  | 0.7671  |
| 2.5104  | 7.5786  | 6.0889  | 2.4848  | 1.1315  | 2.3739  | 1.9114  | 2.2022  | 1.7799  | 1.1453  | 0.4495  |
| 3.4620  | 6.8453  | 4.7033  | 2.0175  | 1.2088  | 2.8136  | 1.9387  | 2.2617  | 1.6209  | 0.9186  | 0.4469  |
| 3.1958  | 7.3199  | 5.1210  | 2.6317  | 1.3053  | 3.6973  | 2.4979  | 3.1094  | 1.9154  | 1.2777  | 0.5216  |
| 2.6919  | 6.8718  | 5.0222  | 2.4409  | 1.1117  | 3.0743  | 2.5853  | 2.6904  | 1.6520  | 1.1111  | 0.5451  |
| 0.2772  | 1.9545  | 1.9669  | 0.5458  | 0.2002  | 0.8319  | 0.9067  | 0.6268  | 0.5851  | 0.5094  | 0.2427  |
| 3.0561  | 7.2480  | 5.3044  | 2.3780  | 1.2152  | 2.9616  | 2.1160  | 2.5244  | 1.7721  | 1.1139  | 0.4726  |
| 0.4909  | 0.3719  | 0.7108  | 0.3207  | 0.0870  | 0.6740  | 0.3310  | 0.5075  | 0.1474  | 0.1816  | 0.0424  |
| 0.3259  | 0.7598  | 0.8267  | 0.8717  | 0.4576  | 0.8642  | 0.4472  | 0.7394  | 0.7476  | 0.9933  | 0.6375  |
| 1.1353  | 1.0547  | 1.0562  | 0.9742  | 1.0931  | 0.9633  | 0.8185  | 0.9383  | 1.0727  | 1.0025  | 0.8671  |
| PC36:0p | PC38:4p | PC38:3p | PC38:2p | PC38:1p | PC40:6p | PC40:5p | PC40:4p | PC40:3p | PC40:2p | PC40:1p |
| 1.4827  | 4.3867  | 4.4069  | 1.2824  | 0.6176  | 1.2555  | 1.2941  | 1.1656  | 0.9769  | 0.3736  | 0.1682  |
| 2.7023  | 8.7548  | 7.2924  | 2.3496  | 1.2218  | 3.9080  | 3.4647  | 2.5050  | 1.7686  | 0.8017  | 0.3720  |
| 2.2495  | 7.4536  | 6.7230  | 1.8786  | 0.8222  | 3.1962  | 3.1500  | 2.2168  | 1.5484  | 0.6381  | 0.2730  |
| 2.7880  | 10.2782 | 9.1304  | 2.7719  | 1.0541  | 3.3538  | 2.9374  | 2.6839  | 2.0524  | 0.7899  | 0.3651  |
| 0.8680  | 3.7809  | 3.1150  | 0.9620  | 0.4329  | 1.1502  | 1.0463  | 0.8923  | 0.6661  | 0.2334  | 0.1101  |
| 1.5947  | 5.7984  | 4.3138  | 1.2818  | 0.7756  | 3.6228  | 2.5133  | 1.5381  | 1.0019  | 0.4508  | 0.3594  |
| 2.1448  | 6.8650  | 6.1408  | 1.8368  | 0.8872  | 2.7866  | 2.6363  | 1.9625  | 1.4313  | 0.6045  | 0.2711  |
| 0.6165  | 2.2428  | 1.5283  | 0.5348  | 0.3073  | 1.3729  | 1.1729  | 0.7050  | 0.4087  | 0.2160  | 0.1019  |
| 1.7502  | 6.6192  | 5.5197  | 1.6719  | 0.7542  | 2.7089  | 2.1656  | 1.7048  | 1.2401  | 0.4914  | 0.2782  |
| 0.9694  | 3.3255  | 3.1838  | 0.9659  | 0.3111  | 1.3566  | 0.9923  | 0.9074  | 0.7232  | 0.2805  | 0.1456  |
| 0.5839  | 0.9206  | 0.7759  | 0.8086  | 0.6261  | 0.9478  | 0.6238  | 0.7175  | 0.7106  | 0.6095  | 0.9479  |
| 0.8160  | 0.9642  | 0.8989  | 0.9102  | 0.8500  | 0.9721  | 0.8215  | 0.8687  | 0.8664  | 0.8129  | 1.0263  |

| PC32:2 | PC32:1 | PC32:0  | PC34:3 | PC34:2   | PC34:1   | PC36:5  | PC36:4   | PC36:3  | PC36:2   | PC36:1  | PC38:6  |
|--------|--------|---------|--------|----------|----------|---------|----------|---------|----------|---------|---------|
| 1.6998 | 4.8698 | 6.8781  | 9.0776 | 215.6263 | 94.1413  | 8.6519  | 78.0580  | 55.4523 | 117.1800 | 28.9872 | 39.3984 |
| 1.7381 | 5.5412 | 7.7870  | 9.5893 | 280.9822 | 126.3485 | 12.2622 | 77.5650  | 63.6382 | 113.3622 | 24.8255 | 73.9267 |
| 0.4291 | 4.1861 | 8.6455  | 5.1243 | 212.3872 | 95.7182  | 3.7654  | 48.4377  | 30.7865 | 69.7114  | 16.3444 | 33.3442 |
| 1.4011 | 5.0807 | 7.3320  | 7.5227 | 255.3079 | 130.6582 | 4.4330  | 68.8836  | 59.4612 | 143.6798 | 34.6228 | 29.8787 |
| 1.4186 | 9.1482 | 11.0366 | 8.1666 | 257.6482 | 160.1418 | 3.7296  | 45.7092  | 59.9674 | 122.1045 | 33.7317 | 27.7074 |
| 1.2000 | 4.8524 | 8.5903  | 8.9601 | 321.5911 | 142.8053 | 6.7448  | 85.5140  | 66.4710 | 144.5596 | 31.9723 | 57.6421 |
| 1.2890 | 4.8657 | 7.7702  | 7.9304 | 236.3319 | 105.4027 | 8.2265  | 68.0202  | 49.9590 | 100.0845 | 23.3857 | 48.8898 |
| 0.7450 | 0.6775 | 0.8838  | 2.4436 | 38.7022  | 18.1567  | 4.2643  | 16.9608  | 17.1009 | 26.3731  | 6.4432  | 21.8929 |
| 1.3399 | 6.3604 | 8.9863  | 8.2165 | 278.1824 | 144.5351 | 4.9691  | 66.7023  | 61.9665 | 136.7813 | 33.4423 | 38.4094 |
| 0.1215 | 2.4170 | 1.8838  | 0.7200 | 37.6112  | 14.8177  | 1.5775  | 19.9919  | 3.9092  | 12.7181  | 1.3487  | 16.6913 |
| 0.9126 | 0.3606 | 0.3687  | 0.8553 | 0.2504   | 0.0445   | 0.2825  | 0.9348   | 0.3014  | 0.0957   | 0.0572  | 0.5457  |
| 1.0395 | 1.3072 | 1.1565  | 1.0361 | 1.1771   | 1.3713   | 0.6040  | 0.9806   | 1.2403  | 1.3667   | 1.4300  | 0.7856  |
| PC32:2 | PC32:1 | PC32:0  | PC34:3 | PC34:2   | PC34:1   | PC36:5  | PC36:4   | PC36:3  | PC36:2   | PC36:1  | PC38:6  |
| 0.8681 | 2.1206 | 3.8310  | 3.8979 | 184.0293 | 66.6702  | 1.8194  | 60.0103  | 40.7503 | 79.2104  | 15.5165 | 21.5478 |
| 1.5805 | 3.3267 | 6.3776  | 5.6692 | 274.5600 | 91.6091  | 6.7905  | 86.3176  | 51.7612 | 118.2618 | 22.0117 | 55.5539 |
| 0.8488 | 2.7256 | 6.0606  | 4.4325 | 229.3259 | 80.0559  | 5.1120  | 81.8137  | 35.5901 | 83.7317  | 16.2148 | 59.9694 |
| 1.3802 | 3.8198 | 6.9739  | 8.0954 | 259.4250 | 93.7071  | 6.0969  | 125.7297 | 63.5513 | 102.4436 | 19.6273 | 51.2377 |
| 1.3094 | 2.0297 | 3.3617  | 3.6179 | 155.6768 | 53.0179  | 2.1559  | 45.3294  | 33.8694 | 66.7995  | 12.8195 | 17.7509 |
| 0.6241 | 1.4102 | 3.8102  | 3.4857 | 168.1792 | 53.9119  | 5.4281  | 51.6718  | 33.2408 | 79.1449  | 14.5766 | 43.9643 |
| 1.0991 | 2.7243 | 5.4231  | 4.6665 | 229.3051 | 79.4451  | 4.5740  | 76.0472  | 42.7005 | 93.7347  | 17.9143 | 45.6904 |
| 0.4170 | 0.6030 | 1.3878  | 0.9085 | 45.2653  | 12.4807  | 2.5288  | 14.0698  | 8.2601  | 21.3611  | 3.5655  | 21.0243 |
| 1.1046 | 2.4199 | 4.7153  | 5.0663 | 194.4270 | 66.8790  | 4.5603  | 74.2436  | 43.5538 | 82.7960  | 15.6744 | 37.6510 |
| 0.4176 | 1.2513 | 1.9689  | 2.6241 | 56.6360  | 23.2381  | 2.1090  | 44.7008  | 17.3211 | 18.1004  | 3.5342  | 17.6135 |
| 0.9880 | 0.7236 | 0.6376  | 0.8154 | 0.4516   | 0.4557   | 0.9946  | 0.9501   | 0.9423  | 0.5357   | 0.4828  | 0.6384  |
| 1.0050 | 0.8883 | 0.8695  | 1.0857 | 0.8479   | 0.8418   | 0.9970  | 0.9763   | 1.0200  | 0.8833   | 0.8750  | 0.8240  |

| PC38:5  | PC38:4  | PC38:3  | PC40:7 | PC40:6  | PC40:5  |
|---------|---------|---------|--------|---------|---------|
| 30.3580 | 76.4289 | 31.7369 | 3.3846 | 22.9106 | 8.7005  |
| 38.9963 | 54.3168 | 24.3189 | 4.7255 | 28.4908 | 10.0731 |
| 15.0681 | 30.5356 | 9.4798  | 1.9379 | 11.1640 | 4.4666  |
| 22.0077 | 60.2680 | 30.2003 | 2.0092 | 14.5027 | 7.3264  |
| 19.2327 | 34.3843 | 18.3517 | 2.9167 | 11.6600 | 5.1263  |
| 31.6289 | 62.0265 | 23.8356 | 3.9765 | 24.0155 | 8.9473  |
| 28.1408 | 53.7604 | 21.8452 | 3.3493 | 20.8551 | 7.7467  |
| 12.1172 | 22.9517 | 11.3329 | 1.3941 | 8.8444  | 2.9224  |
| 24.2897 | 52.2262 | 24.1292 | 2.9675 | 16.7261 | 7.1333  |
| 6.5056  | 15.4766 | 5.9297  | 0.9847 | 6.4708  | 1.9178  |
| 0.6530  | 0.9281  | 0.7725  | 0.7181 | 0.5496  | 0.7763  |
| 0.8631  | 0.9715  | 1.1046  | 0.8860 | 0.8020  | 0.9208  |

| PC38:5  | PC38:4  | PC38:3  | PC40:7 | PC40:6  | PC40:5 |
|---------|---------|---------|--------|---------|--------|
| 17.5861 | 45.8224 | 15.4612 | 1.5092 | 7.4382  | 4.1127 |
| 27.9340 | 56.1872 | 16.5716 | 2.8802 | 16.7386 | 6.0803 |
| 23.9225 | 55.5190 | 13.2076 | 2.4149 | 17.8458 | 5.4231 |
| 36.2619 | 89.0796 | 26.5262 | 3.2727 | 16.2542 | 8.0562 |
| 12.0995 | 30.5676 | 13.4836 | 1.0118 | 5.9961  | 3.0803 |
| 18.9216 | 37.6805 | 11.2608 | 2.8812 | 14.0612 | 4.3174 |
| 23.1475 | 52.5095 | 15.0801 | 2.2681 | 14.0075 | 5.2054 |
| 5.2173  | 5.8009  | 1.7141  | 0.6972 | 5.7161  | 1.0017 |
| 22.4277 | 52.4426 | 17.0902 | 2.3886 | 12.1038 | 5.1513 |
| 12.4569 | 31.9273 | 8.2470  | 1.2083 | 5.4019  | 2.5907 |
| 0.9309  | 0.9973  | 0.7006  | 0.8883 | 0.6966  | 0.9747 |
| 0.9689  | 0.9987  | 1.1333  | 1.0531 | 0.8641  | 0.9896 |

**Table S3. Levels of lipid metabolites in human cancer cell lines.**  
**pmol/mg cell protein<sup>a</sup>**

| metabolite <sup>b</sup> | Sample      |           |         |        |        |        |         |          |        |        |
|-------------------------|-------------|-----------|---------|--------|--------|--------|---------|----------|--------|--------|
|                         |             | PC        | PE      | PS     | PA     | PG     | PI      | LPC      | LPE    | LPS    |
| A549 shControl          | 1           | 899.2753  | 18.9039 | 0.4605 | 0.4511 | 0.2374 | 8.6831  | 104.0814 | 3.0160 | 0.0366 |
|                         | 2           | 1011.7045 | 15.2624 | 0.6385 | 0.4395 | 0.3013 | 8.6990  | 89.1394  | 6.1410 | 0.0236 |
|                         | 3           | 643.8449  | 15.8857 | 1.4484 | 0.4056 | 0.2641 | 4.1804  | 82.0223  | 4.2915 | 0.1445 |
| A549 shABHD6            | 4           | 939.2726  | 18.1905 | 0.5322 | 0.3193 | 0.3963 | 10.0203 | 129.4670 | 3.3576 | 0.0385 |
|                         | 5           | 886.9339  | 13.6218 | 0.5095 | 0.4570 | 0.2935 | 7.3023  | 101.0533 | 4.1829 | 0.0335 |
|                         | 6           | 1093.0132 | 15.6899 | 0.4700 | 0.4282 | 0.2385 | 7.5979  | 138.7879 | 2.8054 | 0.0555 |
| A549 shControl          | av          | 851.6082  | 16.6840 | 0.8491 | 0.4321 | 0.2676 | 7.1875  | 91.7477  | 4.4829 | 0.0683 |
|                         | sem         | 188.5054  | 1.9476  | 0.5265 | 0.0236 | 0.0321 | 2.6043  | 11.2585  | 1.5713 | 0.0664 |
| A549 shABHD6            | av          | 973.0732  | 15.8340 | 0.5039 | 0.4015 | 0.3094 | 8.3068  | 123.1027 | 3.4487 | 0.0425 |
|                         | sem         | 107.1169  | 2.2877  | 0.0314 | 0.0726 | 0.0801 | 1.4913  | 19.6559  | 0.6933 | 0.0115 |
|                         | p-value     | 0.3868    | 0.6498  | 0.3203 | 0.5256 | 0.4482 | 0.5535  | 0.0746   | 0.3558 | 0.5440 |
|                         | fold-change | 1.1426    | 0.9491  | 0.5934 | 0.9291 | 1.1564 | 1.1557  | 1.3418   | 0.7693 | 0.6226 |
| metabolite <sup>b</sup> |             | PC        | PE      | PS     | PA     | PG     | PI      | LPC      | LPE    | LPS    |
| SPC-A-1 shControl       | 1           | 611.1370  | 12.9279 | 0.3197 | 0.3048 | 0.0859 | 4.0903  | 84.8426  | 1.9965 | 0.0137 |
|                         | 2           | 921.7535  | 21.3990 | 0.4013 | 0.5168 | 0.2322 | 5.9983  | 94.9142  | 2.4271 | 0.0495 |
|                         | 3           | 781.3258  | 15.9890 | 0.4239 | 0.6290 | 0.1020 | 4.7626  | 87.3519  | 1.9088 | 0.0238 |
| SPC-A-1 shABHD6         | 4           | 994.6832  | 17.2402 | 0.4947 | 0.7616 | 0.1304 | 5.1667  | 103.4193 | 2.4393 | 0.0584 |
|                         | 5           | 491.4597  | 13.6254 | 0.5153 | 0.1862 | 0.1338 | 2.9013  | 86.6235  | 1.8820 | 0.0218 |
|                         | 6           | 593.1831  | 15.1139 | 0.2571 | 0.3884 | 0.1184 | 3.0190  | 72.9663  | 2.2699 | 0.0195 |
| SPC-A-1 shControl       | av          | 771.4054  | 16.7720 | 0.3816 | 0.4835 | 0.1400 | 4.9504  | 89.0362  | 2.1108 | 0.0290 |
|                         | sem         | 155.5457  | 4.2895  | 0.0548 | 0.1646 | 0.0802 | 0.9678  | 5.2428   | 0.2774 | 0.0184 |
| SPC-A-1 shABHD6         | av          | 693.1087  | 15.3265 | 0.4224 | 0.4454 | 0.1275 | 3.6957  | 87.6697  | 2.1971 | 0.0332 |
|                         | sem         | 266.0777  | 1.8167  | 0.1435 | 0.2919 | 0.0081 | 1.2754  | 15.2534  | 0.2857 | 0.0218 |
|                         | p-value     | 0.6827    | 0.6195  | 0.6698 | 0.8533 | 0.8013 | 0.2462  | 0.8904   | 0.7264 | 0.8121 |
|                         | fold-change | 0.8985    | 0.9138  | 1.1068 | 0.9211 | 0.9106 | 0.7465  | 0.9847   | 1.0409 | 1.1444 |

<sup>a</sup> all values are pmoles/mg cell protein.

<sup>b</sup> metabolite abbreviations are as follows: PC,phosphatidylcholines;PE,phosphatidylethanolamines;PS,phosphatidylserines;PA,phosphatidic acids;PG,ph

| LPA    | LPI    |
|--------|--------|
| 0.4050 | 2.2812 |
| 0.2715 | 1.4636 |
| 0.1409 | 2.5484 |
| 0.4736 | 2.6829 |
| 0.4789 | 2.3461 |
| 0.4474 | 3.7062 |
| 0.2725 | 2.0977 |
| 0.1320 | 0.5652 |
| 0.4666 | 2.9117 |
| 0.0169 | 0.7084 |
| 0.0649 | 0.1947 |
| 1.7126 | 1.3880 |

| LPA    | LPI    |
|--------|--------|
| 0.2037 | 0.9182 |
| 0.4336 | 5.6714 |
| 0.2945 | 2.3463 |
| 0.3846 | 6.1514 |
| 0.0924 | 0.8445 |
| 0.1603 | 1.3596 |
| 0.3106 | 2.9786 |
| 0.1158 | 2.4389 |
| 0.2124 | 2.7852 |
| 0.1530 | 2.9266 |
| 0.4255 | 0.9341 |
| 0.6840 | 0.9351 |

osphatidylglycerols;PI,phosphatidylinositols;LBPA,lyso-bisphosphatidic acids;LPC,lyso-PC;LPE,lyso-PE;LPS,lyso-PS;LPA,lyso-PA;LPI,lyso-PI.
